# Supplementary material for: Predicting carbon dioxide and energy fluxes across global FLUXNET sites with regression algorithms
Source: Copernicus journal article supplement (doi:10.5194/bg-2015-661), 2016-03-07
Supplement: Supplementary file [file bg-2015-661-RC3-supplement.pdf]

# **Predicting carbon and energy fluxes across global FLUXNET sites with regression algorithms**

3

4 G. Tramontana<sup>1</sup>, M. Jung<sup>2</sup>, G. Camps-Valls<sup>3</sup>, K. Ichii<sup>4,5</sup>, B. Raduly<sup>1,6</sup>, M. Reichstein<sup>2</sup>, C. R.  
5 Schwalm<sup>7</sup>, M. A. Arain<sup>8</sup>, A. Cescatti<sup>9</sup>, G. Kiely<sup>10</sup>, L. Merbold<sup>11</sup>, P. Serrano-Ortiz<sup>12</sup>, S.  
6 Sickert<sup>13</sup>, S. Wolf<sup>14</sup> and D. Papale<sup>1</sup>.

7

8 <sup>1</sup>Department for Innovation in Biological, Agro-food and Forest systems (DIBAF), Univeristy of Tuscia,  
9 Viterbo, 01100, Italy,

10 <sup>2</sup>Max Planck Institute for Biogeochemistry, Jena, 07745, Germany;

11 <sup>3</sup>Image Processing Laboratory (IPL), Paterna (València), 46980, Spain.

12 <sup>4</sup>Department of Environmental Geochemical Cycle Research, Japan Agency for Marine-Earth Science and  
13 Technology, Yokohama, 236-0001, Japan.

14 <sup>5</sup>Center for Global Environmental Research, National Institute for Environmental Studies, Tsukuba, 305-  
15 8506, Japan.

16 <sup>6</sup>Department of Bioengineering Sapientia Hungarian University of Transylvania, Miercurea Ciuc, 530104,  
17 Romania.

18 <sup>7</sup>Woods Hole Research Center, Falmouth MA, 02540, USA.

19 <sup>8</sup>School of Geography and Earth Sciences, McMaster University, Hamilton (Ontario), L8S4L8, Canada

20 <sup>9</sup>Institute European Commission, Joint Research Centre, Institute for Environment and Sustainability, Ispra,  
21 Ispra, 21027, Italy

22 <sup>10</sup>Civil & Environmental Engineering and Environmental Research Institute, University College, Cork, T12  
23 YN60, Ireland.

24 <sup>11</sup>Department of Environmental Systems Science, Institute of Agricultural Sciences, ETH Zurich, Zurich,  
25 8092, Switzerland.

26 <sup>12</sup>Department of Ecology, University of Granada, Granada, 18071, Spain.

27 <sup>13</sup>Computer Vision Group, Friedrich Schiller University Jena, 07743 Jena, Germany

28 <sup>14</sup>Department of Environmental Systems Science, ETH Zurich, Zurich, 8092, Switzerland.

29      *Correspondence to:* G. Tramontana (g.tramontana@unitus.it)

Use present time wherever possible!

30 **Abstract**

31

32 Spatial-temporal fields of land-atmosphere fluxes <sup>io</sup> ~~derived from~~ <sup>simulated with</sup> data-driven models can  
33 complement simulations <sup>from</sup> ~~by~~ process-based Land Surface Models. While a number of  
34 strategies for empirical models with eddy covariance flux data have been applied, a  
35 systematic intercomparison of these methods <sup>is</sup> ~~has been~~ missing so far. In this study, we  
36 perform a cross-validation experiment <sup>to</sup> ~~for~~ predicting carbon dioxide, latent heat, sensible  
37 heat and net radiation fluxes, <sup>for</sup> ~~in~~ different ecosystem types with eleven machine learning  
38 (ML) methods from four different classes (kernel methods, neural network, tree  
39 methods, and regression splines). We <sup>applied</sup> ~~employ~~ two complementary setups: (1) eight days  
40 average fluxes based on remotely sensed data, and (2) daily mean fluxes based on  
41 meteorological data and mean seasonal cycle <sup>s</sup> of remotely sensed variables. The pattern  
42 of predictions from different ML and setups <sup>a</sup> ~~were~~ very consistent. There <sup>a</sup> ~~were~~ systematic  
43 differences in performance <sup>between</sup> ~~among~~ the fluxes, <sup>in</sup> ~~with~~ the following ascending order: net  
44 ecosystem exchange ( $R^2 < 0.5$ ), ecosystem respiration ( $R^2 > 0.6$ ), gross primary production  
45 ( $R^2 > 0.7$ ), latent heat ( $R^2 > 0.7$ ), sensible heat ( $R^2 > 0.7$ ), net radiation ( $R^2 > 0.8$ ). ML methods  
46 predicted very well the across sites variability and the seasonal cycle ( $R^2 > 0.7$ ) of the  
47 observed fluxes, while the weekly deviations from the mean seasonal cycle were not well  
48 predicted ( $R^2 < 0.5$ ). Fluxes were better predicted at forested and temperate climate sites  
49 than at ones growing in extreme climates or less represented ~~at~~ in training data (e.g. the  
50 tropics). The large ensemble of ML based models evaluated will be the basis of new  
51 global flux products.

52

53 *Keywords:* Machine learning, carbon fluxes, energy fluxes, FLUXNET, remote sensing,  
54 FLUXCOM

55

56

57 **1. Introduction**

58

59 Improving our knowledge of the carbon, water, and energy exchanges between  
60 terrestrial ecosystems and the atmosphere is essential to better understand and model  
61 the Earth's climate system (IPCC, 2007; Reich, 2010). In situ observations of these exchanges  
62 are obtained by the eddy covariance technique, which directly measures turbulent fluxes  
63 between ecosystems and the atmosphere (Aubinet et al., 2012; Baldocchi et al., 2014).  
64 The large-scale measurement network, FLUXNET integrates site observations of these  
65 fluxes globally and provides detailed time series of carbon and energy fluxes across  
66 biomes and climates (Baldocchi et al., 2008). However, eddy-covariance measurements  
67 are site-level observations, and spatial upscaling is required to estimate these fluxes at  
68 regional to global scales.

69 The increasing number of eddy covariance sites across the globe has encouraged the  
70 application of data-driven models by machine learning (ML) methods such as Artificial  
71 Neural Networks (ANNs, Papale et al., 2003), Random Forest (RF, Tramontana et al.,  
72 2015), Model Trees (MTE, Jung et al., 2009; Xiao et al., 2008, 2010) or Support Vector  
73 Regression (SVR, Yang et al., 2006, 2007) to estimate surface-atmosphere fluxes from site  
74 level to regional or global scales (e.g. Beer et al., 2010, Jung et al., 2010, 2011; Kondo et  
75 al., 2015; Schwalm et al., 2010; Yang et al., 2007; Xiao et al., 2008, 2010). The ML  
76 upscaled outputs are also increasingly used to evaluate land surface models (e.g., Anav et  
77 al., 2013; Bonan et al., 2011; Ichii et al., 2009; Piao et al., 2013).

78 The key characteristic of data-driven models compared the process-based ones are the  
79 the fact former's intrinsic observational nature, and that functional relationships are not

80 prescribed but rather emerge from ~~the~~ patterns found in the measurements. In this  
81 context, data-driven models extract multivariate functional relationships between the in -  
82 situ measured fluxes of the network and explanatory variables in an empirical way. The  
83 explanatory variables ~~are~~ <sup>originate</sup> generally ~~coming~~ from satellite remote sensing, providing  
84 <sup>(VI's are only partially descriptive for vegetation state!)</sup> information on vegetation state (e.g., vegetation indices) and other land surface  
85 properties (e.g., surface temperature), along with continuous measurements of  
86 meteorological variables at flux towers.

87 While ML-based upscaling provides a systematic approach to move from point-based flux  
88 estimates to spatially explicit gridded fields, various sources of uncertainty exist. For  
89 example, individual ML methods ~~might~~ <sup>can</sup> have different responses especially when these  
90 models are applied beyond the conditions <sup>represented</sup> ~~sampled~~ by the training dataset (Jung et al.,  
91 2009; Papale et al., 2015). The information content of the driving input variables may not  
92 be sufficient to capture the variability of the fluxes in all conditions (Tramontana et al.,  
93 2015). Moreover, remotely sensed and meteorological gridded datasets are affected by  
94 uncertainties themselves. Remote sensing data contain noise, biases and gaps, and can  
95 be perturbed by atmospheric effects or by the presence of snow. Meteorological gridded  
96 datasets are known to contain product specific biases (Garnaud et al., 2014; Tramontana  
97 et al., 2015; Zhao et al., 2012).

98 Thorough experiments using multiple data-driven models and explanatory variables are  
99 an essential step to identify and assess limitations and sources of uncertainty in the  
100 empirical upscaling approach. In this study, we present and evaluate an ensemble of ML  
101 based empirical models to predict carbon and energy fluxes across FLUXNET sites. The  
102 <sup>included in this study</sup> ~~participating~~ models were selected in the context of the FLUXCOM initiative, forming the  
103 basis of subsequent global flux products. We perform <sup>ed</sup> ~~a~~ consistent cross-validation for  
104 two complementary experimental setups using: (1) eight days average fluxes based on

105 remotely sensed data, and (2) daily mean fluxes based on remotely sensed and  
106 meteorological data. The ML tools span the full range of commonly applied algorithms:  
107 from model tree ensembles, multiple adaptive regression splines, artificial neural  
108 networks, to kernel methods, with several representatives of each family. The different  
109 ML algorithms were trained with consistent sets of predictor variables. Our overarching  
110 aim is to understand how well fluxes of carbon (gross primary production (GPP),  
111 terrestrial ecosystem respiration (TER) and net ecosystem exchange (NEE)), and energy  
112 (latent heat (LH), sensible heat (H) and net radiation (Rn)) can be predicted by an  
113 ensemble of ML methods. More specifically, we address the following questions:

114

- 115 1. Are the patterns of predicted fluxes consistent between the two experimental  
116 setups?
- 117 2. How different are the predictions <sup>for</sup> of the various ML algorithms?
- 118 3. How does ~~the~~ performance differ <sup>between</sup> ~~among~~ capturing the across-sites, seasonal and  
119 the deviations from the mean seasonal cycle variability?
- 120 4. How does the performance differ among climate zones or ecosystem types?

121

122

## 123 **2. Material and methods**

124

### 125 **2.1 Data**

126

127

#### 128 **2.1.1 Eddy covariance study sites**

129

130 We used eddy covariance data from 224 flux-tower sites (supplementary material, Sect.  
131 S1), which originate from the FLUXNET La Thuile synthesis dataset and CarboAfrica  
132 network (Valentini et al., 2014). The study sites are distributed globally and cover most  
133 plant functional types (PFT) and biomes over the globe (Table 1, Giri et al., 2005).

134

135

### 136 2.1.2 Observation-based carbon and energy fluxes

137

138 All flux measurements were post-processed using standardized procedures of **quality**  
(Reference?)  
139 **control** and gap-filled <sup>according to</sup> following Reichstein et al. (2005) and Papale et al. (2006). Estimates  
140 of GPP and TER were derived from half-hourly NEE measurements using two independent  
141 flux partitioning methods: (1) <sup>According to</sup> following Reichstein et al. (2005), where the temperature  
142 sensitivity of ecosystem respiration is initially estimated from night-time NEE data and  
143 then extrapolated to daytime to estimate TER and GPP, <sup>. This is done</sup> by subtracting NEE (negatively  
144 signed for the carbon uptake) from TER; (2) <sup>According to</sup> following Lasslop et al. (2010), where daytime  
145 NEE data <sup>are</sup> is used to constrain a hyperbolic light response curve to directly estimate GPP  
146 and TER. In the following we <sup>refer to</sup> reference GPP and TER derived by Reichstein et al. (2005) as  
147  $GPP_R$  and  $TER_R$ ; <sup>E</sup> whereas estimates based on the Lasslop et al. (2010) method are referred  
148 to as  $GPP_L$  and  $TER_L$ .  
149 <sup>H</sup> The <sup>a</sup> half-hourly data <sup>s</sup> were aggregated to daily values and screened according to multiple  
150 quality criteria, as follow:  
151 1) we excluded data when more than 20% of the data were based on gap-filling with low  
152 confidence (Reichstein et al., 2005);  
153 2) we identified and removed obviously erroneous periods due to non-flagged instrument  
154 or flux partitioning failures based on visual interpretation;

155 3) we excluded data-points where the two flux-partitioning methods provided extremely  
156 different patterns. Specifically, we computed for each site a robust linear regression  
157 between (a)  $TER_R - GPP_L$  and NEE, and (b)  $GPP_R$  and  $GPP_L$ . Data points with a residual  
158 outside the range of  $\pm 3$  times of the inter-quartile range were removed. This criterion  
159 removed only the extreme residuals, systematic differences between methods were not  
160 removed;

161 4) we removed the 5% of data-points with the largest friction velocity ( $u^*$ ) uncertainty,  
162 defined as data points above the 95<sup>th</sup> percentile of daily  $u^*$  uncertainty (measured as  
163 inter-quartile range of 100 bootstrap samples).

164 Similarly to the carbon fluxes, we applied the same criteria 1) and 2) for the energy fluxes.  
165 Additionally, we removed data with inconsistent energy fluxes, i.e. when the residual of a  
166 robust linear regression between  $LE + H$  and  $R_n$  for each site was outside three-times the  
167 inter-quartile range of the residuals.

168

169

#### 170 **2.1.2 Remote sensing data**

171

172 We collected data coming from Moderate Resolution Imaging Spectroradiometer  
173 (MODIS) which provides data at a spatial resolution of 1km or better (Justice et al., 2002).

174 We used the cutout surroundings of 3x3 km pixels centered on the towers. We collected  
175 and processed the following MODIS products: MOD11A2 Land Surface Temperature (LST;  
176 Wan et al., 2002), MOD13A2 Vegetation Index (Normalized Difference Vegetation Index  
177 (NDVI) and Enhanced Vegetation Index (EVI); Huete et al., 2002), MOD15A2 Leaf Area  
178 Index (LAI) and Fraction of Absorbed Photosynthetic Active Radiation (fAPAR; Myneni et  
179 al., 2002), and MCD43A2 and MCD43A4 Bidirectional Reflectance Distribution Function



180 (BRDF) corrected surface reflectances (Schaaf et al., 2002). The BRDF-corrected surface  
181 reflectance data were further processed to calculate the Normalized Difference Water  
182 Index (NDWI) (Gao, 1996) and the Land Surface Water Index (LSWI) (Xiao et al., 2002).  
183 These data were obtained from <http://daac.ornl.gov/MODIS/>.  
184 The remote sensing data were further processed to improve data quality and data gaps  
185 which were filled to create continuous time-series data, and to minimize non-land surface  
186 signals. We adopted the following processing scheme: we identified good quality pixels  
187 by the using the quality assurance/quality criteria (QA/QC) included in the MODIS  
188 product. If more than 25% of pixels had good quality at the time of snapshot, the average  
189 of good quality pixels were assigned as the actual value. Otherwise, the data at the time  
190 snapshot were marked as blank (no data). Then, we created the mean seasonal variations  
191 from 2000-2012 using only good pixels data and the data gaps in the processed data were  
192 filled using the mean seasonal variation. Only MOD13 is provided with 16 days  
193 composite, and eight days data were created by assigning the 16 days composite value to  
194 the corresponding two eight days periods.

195

196

### 197 2.1.3 Meteorological data

198

199 The in situ measured air temperature ( $T_{air}$ ), global radiation ( $R_g$ ), VPD, and precipitation  
200 were used after data screening according to the criteria 1) and 2) as for the measured  
201 fluxes (see Sect. 2.1.2). We also used long-term time series of these variables from ERA-  
202 Interim for the period 1989-2010 (Dee et al., 2011), which were bias-corrected for each  
203 site based on the overlapping period of in situ measurements (see [http://www.bgc-](http://www.bgc-jena.mpg.de/~MDIwork/meteo/)  
204 [jena.mpg.de/~MDIwork/meteo/](http://www.bgc-jena.mpg.de/~MDIwork/meteo/)). These long-term meteorological data are primarily

205 used to calculate consistent metrics of climatological variables (e.g. mean annual  
206 temperature) <sup>for</sup> ~~across~~ all sites given the temporal coverage of data of the different sites. In  
207 addition, we use a composite of these ERA-Interim data based and in situ measured data ,  
208 to obtain a gap-free time series for calculating a simple soil Water Availability Index (WAI,  
209 see Sect. 2.3.2 and supplementary material, Sect. S3).

210

211

## 212 <sup>Applied</sup> **2.2 Participating ML methods**

213

214 We chose 11 ML algorithms for regression from four broad families: tree-based methods,  
215 regression splines, neural networks, kernel methods. Moreover a comprehensive review  
216 of ML algorithms in biophysical parameter estimation can be found in Verrelst et al.  
217 (2015).

218

### 219 Tree based methods

220 These methods construct hierarchical binary decision trees. The inner nodes of the tree  
221 hold decision rules according to explanatory variables (e.g. less/greater than  $X_1$ ),  
222 recursively splitting the data into subspaces. The leaf nodes at the end of the decision  
223 tree contain models for the response variable. Because a single tree is generally not  
224 effective enough to cope with strong non-linear multivariate relationships, ensembles of  
225 trees are often used. We applied two different tree ensemble methods: (1) Random  
226 Forests (RF) which combines regression trees grown from different bootstrap samples  
227 and randomly selected features at each split node (Breiman, 2001; Ho, 1998); and (2)  
228 Model Tree Ensembles (MTE) which combine model trees (Jung et al., 2009). The main  
229 difference between regression and model trees is the prediction model in the leaf node: a

230 simple mean of the target values from training in regression trees and a parametric  
231 function (here a multiple linear regression) in model trees. In this study, we used three  
232 different variants of MTE, which differ mainly with respect to different cost functions ~~for~~ <sup>to</sup>  
233 ~~determining~~ <sup>e</sup> the splits, and the technique to create an ensemble of model trees. Further  
234 details are described in the supplementary material (Sect. S2).

235

#### 236 Regression splines

237 Multivariate regression splines (MARS) are an extension of simple linear regression that  
238 can adapt to non-linear response surfaces—using piecewise (local) functions—by which a  
239 target variable is predicted by the sum of regression splines and a constant value (Alonso  
240 Fernández, 2013; Friedman et al., 1991).

241

#### 242 Neural networks

243 Neural networks are based on nonlinear and nonparametric regressions. Their base unit  
244 is the neuron, where nonlinear regression functions are applied. The neurons are  
245 interconnected and organized in layers. The output of  $m$  neurons in the current layer are  
246 the inputs for  $n$  neurons of the next layer. We used two types of neural networks: the  
247 artificial neural network (ANN) and the group of method for data handle (GMDH). In an  
248 ANN, each neuron performs a linear regression followed by a non-linear function.  
249 Neurons of different layers are interconnected by weights ~~that are~~ adjusted during the  
250 training (Haykin et al., 1999; Papale et al., 2003). The GMDH is a self-organizing inductive  
251 method (Ungaro et al., 2005) building polynomials of polynomials; the neurons are  
252 pairwise connected through a quadratic polynomial to produce new neurons in the next  
253 layer (Shirmohammadi et al., 2015).

254

## 255 Kernel methods

256 Kernel methods (Shawe-Taylor and Cristianini, 2004) owe their name to the use of kernel  
257 functions, which ~~measures~~<sup>measure</sup> similarities between input data examples. Among the  
258 available kernel methods we used: (1) support vector regression (SVR) (Vapnik et al.,  
259 1997), (2) kernel ridge regression (KRR) (Shawe-Taylor and Cristianini, 2004), and (3)  
260 Gaussian process regression (GPR) (Rasmussen, 2006; Verrelst et al., 2012). The SVR  
261 defines a linear prediction model over mapped samples to a much higher dimensional  
262 space, which is non-linearly related to the original input (Verrelst et al., 2012, Yang et al.,  
263 2007). The KRR is considered as the kernel version of the regularized least squares linear  
264 regression (Shawe-Taylor and Cristianini, 2004, Verrelst et al., 2012). The GPR is a  
265 probabilistic approximation to nonparametric kernel-based regression, and both a  
266 predictive mean (point-wise estimates) and predictive variance (error bars for the  
267 predictions) can be derived. We also used a hybrid approach combining RF with simple  
268 decision stumps in the inner nodes and GPR for prediction in the leaf nodes (Fröhlich et  
269 al., 2012).

270

271

## 272 **2.3 Experimental design**

273

274

### 275 **2.3.1. Experiment setups**

276

277 We defined two complementary experimental setups, which differ in the choice of  
278 explanatory variables, and the temporal resolution of the target fluxes: 1) at eight days  
279 temporal resolution using exclusively remote sensing data (hereafter RS); and 2) at daily

280 temporal resolution using meteorological data together with the mean seasonal cycle  
281 (MSC) of remote sensing data (hereafter RS+METEO). In the latter case, the MSC of  
282 remote sensing data were smoothed and interpolated to daily time step. Each setup has  
283 advantages and disadvantages. While RS ~~can~~ provides<sup>a</sup> products with ~~high~~<sup>a</sup> spatial  
284 resolution (~~up to 1km~~<sup>of 1 km or less</sup>), data are limited to the MODIS era (2000-present) and has a  
285 coarse (weekly) temporal resolution. The uncertainties of remote sensing data at tower  
286 locations due to finer scale spatial heterogeneity may also degrade the performance of  
287 the ML methods. RS+METEO can take advantage of information from meteorological  
288 variables, and is resistant to the noise of remote sensing time series because only mean  
289 seasonal cycle of data from satellite ~~were~~<sup>are</sup> used. RS+METEO allows for upscaled products  
290 over a longer time period (because not constrained by the availability of MODIS data) and  
291 finer time scale (daily). However the predictive ~~skill~~<sup>capacity</sup> of this setting ~~was~~<sup>is</sup> conditioned by ~~the~~  
292 missing ~~of~~ information regarding the interannual variability of vegetation greenness. In  
293 addition the use of meteorological gridded datasets introduces another source of  
294 uncertainty ~~coming from~~<sup>e.g.,</sup> potential dataset specific biases and ~~by their~~ typically coarse  
295 spatial resolution (0.5 degrees or larger).

296

297

### 298 **2.3.2. Variable selection**

299

300 Combining remote sensing and meteorological data (see Sect. 2.1.2 and 2.1.3) we created  
301 ~~additional variables for model input~~<sup>model input</sup>. In the case of RS+METEO setup we derived the  
302 Water Availability Index (WAI) ~~that it~~ is based on a simple soil water balance model (for  
303 more details see supplementary material, Sect. S3) as an attempt to better represent  
304 ~~water-stressed~~<sup>waterstress</sup> conditions. For both setups we derived proxies for absorbed radiation as

305 the product between vegetation greenness (e.g. EVI, NDVI, ~~f~~APAR) and available energy  
306 (e.g. daytime LST, Rg, and potential radiation). Other derived variables include the mean  
307 seasonal cycle (MSC) of dynamic variables and associated metrics (minimum, maximum,  
308 amplitude, and mean). For remote sensing predictors, the MSC and associated metrics  
309 are based on the period 2001-2012 while ~~for~~ climate variables are based on the bias  
310 corrected daily long-term ERA-Interim data reference period (1989-2010). In total, 216  
311 potential explanatory variables were created for RS and 231 for RS+METEO (see  
312 supplementary material S4 for details).

313 For each setup we selected a small subset of variables ~~best suited~~ <sup>optimally suitable</sup> to predict the target  
314 fluxes using a variable selection search algorithm. Variable selection is an important  
315 component in ~~the~~ spatial upscaling <sup>since it improves</sup> ~~because~~ the accuracy of predictions <sup>while</sup> ~~improves~~ and the  
316 computational costs of ~~the~~ global predictions are minimized. We used the Guided Hybrid  
317 Genetic Algorithm (GHGA) published by Jung and Zscheischler (2013), which was  
318 designed for variable selection problems with many candidate predictor variables and  
319 computationally expensive cost functions. The GHGA requires the training of a regression  
320 algorithm (here RF) to estimate the cost associated with selected variable subsets (see S5  
321 for details).

322 Instead of doing a computationally demanding variable selection for each individual flux,  
323 variable selection runs were performed for the RS and RS+METEO setups and separately  
324 for carbon and energy fluxes. This procedure has the advantage that the resulting global  
325 products originate from a consistent set of predictor variables. The selected variables for  
326 the prediction of carbon and energy fluxes are listed in Table 2.

327

328

### 329 2.3.3. Model training

330

331 The capability of ML methods to spatially extrapolate carbon and energy fluxes <sup>has been</sup> ~~was~~  
332 evaluated by a 10-fold cross-validation strategy. The training datasets were stratified into  
333 10-folds, each one roughly containing 10% of the data. Entire sites <sup>a</sup> ~~were~~ assigned to each  
334 fold (Jung et al., 2011). The target values for each fold <sup>have been</sup> ~~were~~ predicted based on the  
335 training using the remaining nine folds. Due to computational expense of the RS+METEO  
336 setup, only one method representing each “family” – multiple regressions, RF, MARS,  
337 ANN and KRR – was trained.

338 ML methods base settings <sup>have been</sup> ~~were~~ tuned before the training (for further details, see  
339 supplementary material S6). These hyper-parameters account for regularization ~~in order~~  
340 to avoid overfitting, as well as for the shape and smoothness constraints. Instead, the  
341 model parameters were estimated for each ML every time in each fold

342

343

#### 344 **2.3.4. Model evaluation**

345

346 ~~In order to~~ <sup>To</sup> highlight the differences between the RS and RS+METEO setups, the daily  
347 output from RS+METEO <sup>has been</sup> ~~were~~ aggregated to eight days time steps; the same periods and  
348 sites <sup>have been</sup> ~~were~~ used for the comparison. Besides the statistical analysis of the individual ML  
349 cross-validation results, we <sup>focussed</sup> ~~focus~~ on the ensemble median estimate, ~~here~~ defined as the  
350 median predicted value across all ML for a given setup and time step. The advantages of  
351 the median ensemble estimate is the robustness of the predictions for the contribution of  
352 many ML that reduced the risk of <sup>outliers</sup> ~~outlier~~ in the extrapolation exercise.

353 We used different metrics to evaluate the ML performance such as the Nash and Sutcliffe  
354 model efficiency (MEF), the root mean square error (MSE), the empirical BIAS, the

355 Pearson's linear correlation coefficient ( $\rho$ ), the coefficient of determination ( $R^2$ ) and the  
356 ratio of variance (ROV).

357 MEF (Nash and Sutcliffe, 1970), if the capability of a model to estimate a target variables is  
358 better than a reference model. If the reference model is the mean value of the target,  
359 MEF can be calculated as:

360

$$361 \quad MEF = 1 - \frac{\sum_{i=1}^n (x_i - y_i)^2}{\sum_{i=1}^n (y_i - \bar{y})^2} \quad (1)$$

362

363 where  $x_i$  and  $y_i$  are the predicted and the observed values respectively and  $\bar{y}$  is the  
364 mean value of the observations (here the reference model). MEF can vary between -inf to  
365 1; if MEF > 0 the predictive skill of the model is better than the mean (MEF = 1 for the  
366 ideal model), if MEF=0 the predictive skill of the model is equivalent to the mean, finally if  
367 MEF < 0, the predictive skill of the mean value of the target is better than the model.

368 The RMSE is estimated as the root square of the mean value of the squared residuals:

369

$$370 \quad RMSE = \sqrt{\frac{\sum_{i=1}^n (x_i - y_i)^2}{n}} \quad (2)$$

371

372 The BIAS is evaluated as the differences between the mean value of model's residuals

373

$$374 \quad BIAS = \frac{\sum_{i=1}^n (x_i - y_i)}{n} \quad (3)$$

375



376 Following Gupta et al. (2009) the importance of bias on the overall uncertainty <sup>is</sup> ~~was~~  
377 evaluated as the ratio between the square of BIAS and Mean Square Error, the latter  
378 estimated as the square value of RMSE.

379 The Pearson's linear correlation coefficient ( $\rho$ ) <sup>is</sup> ~~was~~ the ratio between the covariance  
380 between the modeled and observed values ( $\sigma_{xy}$ ) and the product of the standard  
381 deviation of modeled ( $\sigma_x$ ) and observed ( $\sigma_y$ ) values:

382

$$383 \quad \rho = \frac{\sigma_{xy}}{\sigma_x \sigma_y} \quad (4)$$

384

385  $R^2$  <sup>is</sup> ~~was~~ estimated as the squared value of  $\rho$ ; finally ROV <sup>is</sup> ~~was~~ evaluated as the ratio  
386 between predicted and observed standard deviation.

387 We evaluated the overall predictive <sup>capacity</sup> ~~skill~~ of the models, evaluating the consistency among  
388 trained ML approaches and across the experimental setup. Then we evaluated the  
389 capability of the regression models to predict site-specific mean fluxes, mean seasonal  
390 cycle (MSC), and anomalies (Jung et al., 2011). The MSC per site was calculated using the  
391 averaged ~~red~~ values for each eight days ~~period~~ across all available years, but only when at  
392 least two values (i.e., years) for each eight days period <sup>are</sup> ~~were~~ available. To assess the  
393 mean values of the study sites, we calculated the mean of the MSC if at least 50% of the  
394 46 eight daily values <sup>are</sup> ~~were~~ present, whereas the weekly anomalies <sup>have been</sup> ~~were~~ calculated as the  
395 deviation of a flux value from the MSC. Finally, the mean site value was removed from  
396 the MSC to disentangle the seasonal variation from the mean, thus making the MSC and  
397 mean complementary.

398 We also analyzed the performance for the different Köppen climate zones ~~and~~ IGBP plant  
399 functional types. In particular. we computed for each flux, setup and tower site the

performances of ML median estimate. Then, for each setup, we estimated the median value of the site-by-site statistics per PFT and climate zone.

### 3. Results and Discussions

#### 3.1 Overview

The ensemble median estimate always outperformed<sup>s</sup> the median performance of ML-specific methods (the median value of metrics calculated for individual ML) (Table 3; Appendix A). Individual ML methods also exhibited<sup>(what does skill mean here? Unclear phrasing)</sup> higher skill than multiple linear regressions (higher MEF and lower RMSE; Fig. 1). This highlights the added value of ML methods as these are able to account for nonlinearities in either explanatory variables or fluxes. Overall, using the ensemble median estimate gives a representative overview of ML-based flux predictions.

#### 3.2 Predictive<sup>capacity</sup> skill of carbon and energy fluxes

Predictive<sup>capacity</sup> skill of the ensemble median estimate clustered into tiers whereby energy fluxes are uniformly better predicted than carbon fluxes:  $R_n > H/LE/GPP > TER > NEE$  (Table 3). The highest<sup>predictive capacity</sup> skill levels as exhibited by net radiation shows near perfect agreement;  $R_n$  displays a model efficiency (MEF) of 0.91-0.92 and a correlation of 0.96. The decline in<sup>predictive capacity</sup> skill for the second tier fluxes is ca. 15% to 20%; MEF for H, LE, and GPP is

0.79, 0.75-0.76, and 0.71 respectively. The lowest two tiers exhibits 20% and 40% declines in MEF (0.57-0.64 and 0.43-0.46 for TER and NEE respectively). These relative rankings are unchanged regardless of skill metric used—apart from RMSE where the difference in fluxes units and magnitude, confounds a direct comparison (Table 3)—suggesting that accuracy and precision scale linearly.

There were only minor performance differences between the two carbon fluxes partitioning methods (Table 3), although for the RS setup, the performance of  $TER_L$  were comparatively lower than  $TER_R$  (lower MEF,  $\rho$  and ROV). A similar trend was not found in the case of RS+METEO setup.

The overall ~~skill~~ <sup>predictive capacity</sup> profile in this study confirms previous upscaling efforts (Jung et al., 2011; Yuan et al., 2010). This relatively stable cross-study ~~skill~~ <sup>predictive capacity</sup> gradient reflects the information content of the available predictor variables. The spatiotemporal variability of remotely sensed land surface properties is well-suited to predict the top tier fluxes ( $R_n$ ,  $H$ ,  $LE$ , and  $GPP$ ) (Jung et al., 2008; Tramontana et al., 2015; Xiao et al., 2010; Yang et al., 2007)

The higher ~~skill~~ <sup>predictive capacity</sup> associated with energy fluxes suggests that these fluxes are more easily predictable using the drivers selected in particular respect to NEE. In fact NEE is strongly controlled by external factors such management and disturbances (Amiro et al., 2010; Thornton et al., 2002) and by lag and memory effects (Bell et al., 2012; Frank et al., 2015, Papale et al., 2015; Paruelo et al., 2005), which are both poorly captured by predictor variables typically used in upscaling and poorly constrained in general, i.e., data limited. Another reason for the low performances in NEE simulation can be in the uncertainties in the measurements that are larger compared to  $H$  and  $LE$  and have an important effect being NEE the difference between two large components ( $GPP$  and  $TER$ ).

Among the carbon fluxes,  $GPP$  is ~~the best~~ <sup>the best</sup> predicted probably because the seasonal cycle and canopy properties, which ~~were~~ <sup>are</sup> strongly related to  $GPP$ , ~~were~~ <sup>are</sup> well represented by the

450 ML drivers. The intermediate skill of TER, relative to carbon fluxes only, is supported by  
451 its tight coupling to the well-predicted GPP and the availability of predictor variables that  
452 capture the temperature dependency of respiration. However specific drivers for TER  
453 could be still missing. In fact in contrast to GPP, the canopy properties are less important  
454 drivers of TER, while the soil properties, carbon pools and their turnover rates are key for  
455 respiratory processes (Amiro et al., 2010) but not available to be used as drivers. This  
456 likely explains the poor performance for TER in comparison with GPP.

457

458

### 459 **3.3 Are the flux predictions consistent between RS and RS+METEO?**

460

461 <sup>predictive capacity</sup> Skills, in terms of both performance tiers and absolute value of skill metrics, are similar  
462 for both RS and RS+METEO approaches with some differences, in particular: (1) RS and  
463 RS+METEO diverged more for those fluxes and showed lower overall <sup>predictive capacity</sup> skill levels, in  
464 particular for NEE (Fig. 1, Table 3); (2) MEF and correlation values <sup>are</sup> were slightly larger for  
465 RS than RS+METEO, excluding TER<sub>L</sub> where the opposite was found, indicating an  
466 important role of the meteorological data for this version of the ecosystem respiration. It  
467 should be considered that the differences in performances <sup>can</sup> could <sup>be</sup> be also due to a  
468 different ensemble size, with the RS composed of 11 individual ML-based ensemble  
469 members, whereas RS+METEO is based on only four. The overall good performance of  
470 the RS setup implies that carbon and energy fluxes can be mapped exclusively based on  
471 remotely sensed inputs allowing high-spatial resolution products and reduction of  
472 uncertainty due to the meteorological drivers spatialization (Tramontana et al., 2015).  
473 Nonetheless, the differences between the experimental setups were less appreciable.

474

475

476 **3.4 How different are the predictions of the various ML algorithms?**

477 are

478 Pair-wise  $R^2$  values for model outputs (Table 4) were close to unity ( $R^2 \geq 0.90$ ), regardless

479 the of experimental setup, with NEE showing a slightly lower value ( $R^2 = 0.84$ ). Between Among

480 corresponding model residuals (Table 4),  $R^2$  values ranged from 0.79 ( $R_n$ ) to 0.89 ( $TER_L$ ).

481 Comparing the same ML technique but using different experimental setups (Table 4, RS

482 vs. RS+METEO) showed a similarly high, albeit somewhat diminished level of consistency

483 ( $R^2$  range ranged from 0.71 to 0.80 for model residuals). These finding highlights that the

484 ML methods were mapping between explanatory variables and target fluxes both reliably

485 and robustly. Between Across the all three consistency checks there was also a tendency for better

486 predicted fluxes (e.g., H) to exhibit higher pair-wise  $R^2$  values than poorly predicted fluxes

487 (e.g., NEE). This is expected as more robust patterns—and therefore those that lead to

488 greater predictive power skill—are easier to extract regardless of ML algorithm and

489 experimental setup in this study; thus increasing consistency. T While this broad

490 consistency confirms that the extracted patterns are robust, The decline in  $R^2$  when

491 comparing the same ML trained with different drivers (RS vs RS+METEO) respect to the

492 correlation among ML methods with the same drivers, suggests that the choice of the

493 explanatory variable had a higher impact than the choice of the ML technique for the

494 pattern of predictions.

495

496

497 **3.5 How does the performance differ among capturing the across-sites, seasonal and**

498 **the deviations from the mean seasonal cycle variability?**

499

Decomposing FLUXNET data into across-sites variability, mean seasonal cycle, and interannual variability components (Sect. 2.3.4) revealed clear gradients in predictive <sup>capacity</sup> skill (Table 5 and Fig. 2). Across-sites variability <sup>is</sup> was in general well-captured by the ML ( $R^2$  range: 0.61 to 0.81 except for NEE) and the best predicted pattern for GPP and TER. This suggests that ML <sup>is</sup> are suitable to reproduce the spatial pattern of mean annual fluxes.

The variability in the mean seasonal cycle (at weekly time scale) was also uniformly well predicted ( $R^2$  between 0.67-0.77 for GPP and TER, and between 0.86-0.98 for the energy fluxes) and the best predicted pattern for energy fluxes in particular for LE and Rn.

The importance of <sup>phenology</sup> seasonality in carbon and energy annual fluxes is known (Joiner et al., 2014; Jung et al., 2011; Merbold et al., 2009; Wolf et al., 2011). <sup>B</sup> and biases in its dynamic <sup>phenological</sup> s (e.g. in the growing season length) <sup>can</sup> could lead to biases into the predicted fluxes (Ichii et al., 2010). A clear benefit of the ML upscaling approach ~~used here~~ is that none of the parameters controlling <sup>phenology</sup> seasonality are prescribed, reducing the possibility of biases.

In contrast, interannual variability is generally poorly captured by all the ML approaches <sup>O</sup> used ~~with~~ only H and Rn showing an  $R^2$  greater than 0.4. This low predictive <sup>capacity</sup> skill holds regardless of whether weekly, monthly (Jung et al., 2011), or annual time steps are used (data not shown). This is likely due to a combination of missing predictor variables (e.g. disturbances, management, legacy effects) and the noise/uncertainty in both predictor and target variables <sup>ing</sup> that plays a major role when small differences (like in the interannual variability) are predicted. The slightly better performances when sensible heat flux is estimated <sup>for</sup> could be due to the lower uncertainty <sup>with</sup> in this flux respect to the others (only one sensor used, the sonic anemometer, in contract with the other fluxes where also the gas analyzer is used) but also to the fact that it is strongly and directly related to the LST <sup>a</sup> used as driver. In any case, predicting interannual variability remains one of the largest challenges in the context of empirical upscaling.

525 NEE is confirmed to be the most difficult and consequently poorest predicted flux (Table  
526 3). NEE ~~shows~~ considerably lower ~~skill~~ relative to the other fluxes for ~~across-sites~~  
527 variability ( $R^2 = 0.46$ ), the mean seasonal cycle ( $R^2 = 0.59$ ), and interannual variability ( $R^2 =$   
528 0.13,  $TER_L$  is lowest at 0.10).

529

530

### 531 3.6 How does the performance differ among climate zones or ecosystem types?

532

533 Using climate zone and plant functional type (PFT) to disaggregate ML methods  
534 performances we find that in general energy fluxes are better predicted than carbon  
535 fluxes ~~among the~~ different climate zone and PFTs (Fig. 3 and Appendix C). The median  $R^2$   
536 between simulation and observation for carbon fluxes (excluding NEE) is ~~greater~~ larger  
537 for more than 75% of the PFT and climate zone, while ~~in~~ the energy fluxes an  $R^2$  greater  
538 than 0.7 is found for more than the 85% of the PFT and climate zone (in all sites for  $R_n$ ).

539 NEE is again consistently poorly predicted (low  $R^2$  and high relative RMSE; Fig. 3), apart  
540 from deciduous broadleaf forests (DBF) and MF where a marginal improvement is  
541 ~~evident~~ elicited. The better performance ~~in~~ for these two vegetation types ~~could~~ can  
542 higher seasonal variance of NEE in comparison with the other PFTs that ~~is~~ in a pattern more  
543 consistent with the seasonal variance of the used drivers.

544 Overall the ML methods show poor prediction capability in ~~tropics~~ tropical and evergreen  
545 broadleaf forests (EBF). Possible explanations are the absence of a clear seasonal cycle  
546 traceable by ~~the~~ remote sensing ~~signal~~ (evergreen vegetation) and a low variance in their  
547 seasonal cycle ~~that is~~ challenging to explained mathematically and capture with a model.  
548 (Sims et al., 2008; Yebra et al., 2015; Yuan et al., 2010). In addition, the difficulty in

549 acquiring cloud-free remotely sensed data introduces additional uncertainty in the  
550 drivers.

551 Reason for low performances can ~~be~~<sup>be</sup> also the lack of important driving variables, that are  
552 probably the main explanation for cropland where management information ~~are~~<sup>is</sup> missing (e.g.  
553 irrigation, fertilization, tillage) and also for cold and dry environments where the extreme nature  
554 of the environments characterized by water limitation (for dry sites) and the extreme low  
555 temperature (for cold sites) would require probably more targeted drivers such direct estimations  
556 of soil water content. In addition, cold and dry sites are characterized by both low magnitude and  
557 low variance of fluxes, making it difficult to explain the fluxes in these ecosystems types by  
558 empirical models.

559

560

#### 561 **4. Conclusions**

562

563 The ML methods presented and evaluated in this study ~~have shown~~ high capability to  
564 predict carbon and energy fluxes, in particular the between-site variability and the  
565 seasonal variations, with a general tendency of increasing performance in the following  
566 order: NEE, TER, GPP, LE, H, and Rn. The relatively poor performance for NEE likely results  
567 from factors that cannot be easily accounted for in ML based modelling approaches, such  
568 as legacies of site history (e.g. disturbances, management, age and stocks). Future  
569 progress in this direction requires the reconstruction of the relevant management and  
570 disturbance history, trying to integrate information from forest inventories, high  
571 resolution satellites such LANDSAT and high resolution biomass data from radar and  
572 LIDAR with the aim to improve model performance. The better results obtained for the  
573 energy fluxes (LE and H) in comparison to the carbon fluxes (GPP and TER) could be  
574 related to more complex mechanisms driving the carbon cycle that are also not



575 represented in the drivers used, in addition to a relatively higher uncertainties in ~~the~~ GPP  
576 and TER due to the use of flux partitioning methods based on NEE measurements.

577 We found no substantial bias in the predictions of the ML models for most vegetation  
578 types or biomes. However, the predictions ~~have~~ deviated more from the observations for  
579 evergreen broadleaf forests, croplands, the tropics and extreme climates. The growing  
580 number of eddy-covariance sites, in particular new sites in poorly represented regions  
581 will likely improves the predictive ~~skill~~<sup>capacity</sup> in the future. This is particularly relevant since  
582 tropical areas account for a disproportionate share of the global water and carbon cycle  
583 (Beer et al., 2010).

584 The deviations from the mean seasonal cycle (weekly anomalies) are still poorly captured  
585 by the ML methods. We expected the RS+METEO approach to perform better regarding  
586 the prediction of anomalies as meteorological drivers were included and the noise in  
587 remote sensing time series was greatly reduced by using smoothed seasonal cycle.  
588 However, this was not the case, which indicates that either, the weekly anomalies of  
589 both, the flux data, and the drivers, are strongly affected by the uncertainties, or that the  
590 anomalies are dominated by management and disturbance (or other factors) not  
591 accounted for in the predictors. Hence, the prediction of interannual anomalies remains a  
592 major unresolved research topic.

593 The predictions for ecosystem fluxes across FLUXNET by different ML techniques and by  
594 different explanatory variable sets (RS vs RS+METEO) are highly consistent, indicating that  
595 the extracted patterns by the trained models are robust, realistic and not subject to  
596 severe overfitting. The differences in predictions ~~among~~<sup>between</sup> the RS and RS+METEO setups are  
597 slightly larger than ~~among~~<sup>between</sup> different ML methods, suggesting that future activities should  
598 concentrate on identifying new driver variables to further improve the performance of  
599 fluxes predictions. Nevertheless, we recommend using the ensemble median estimate of

600 multiple ML techniques <sup>analyze</sup> ~~for analyzing~~ global flux products because extrapolation beyond  
601 the FLUXNET-sampled conditions can generate larger <sup>between</sup> ~~among~~ differences than  
602 discernible from our cross-validation comparison.

603 The ML based models presented and extensively evaluated here <sup>are</sup> ~~form~~ the basis of an  
604 extensive archive of global gridded flux products, which is currently under development.

605 The thorough cross-validation experiment presented in this paper helps users  
606 understanding the products' strengths and weaknesses. The good performance of the ML  
607 methods, the availability of an ensemble of them, and the detailed analysis of their  
608 uncertainties will make this archive an unprecedented data stream to study the global  
609 land-atmosphere exchange of carbon, water and energy.

610

611

## 612 **Appendix A: Median performance of the methods.**

613

614 In table A1 we reported, for both setups, the median value of skill metrics (MEF, RMSE,  
615 and absolute value of BIAS) realized by singular ML and their related variability such  
616 estimated as the median absolute deviation (MAD) from the median multiplied per  
617 1.4826 (see Jung et al., 2009 for details)

618

619

## 620 **Appendix B: scatterplot between the observations and the predictions by the median** 621 **ensemble of ML.**

622

623 In Fig. B1 and B2 we reported the scatterplots between eddy covariance observations and  
624 the modeled median ensemble estimates respectively for RS and RS+METEO setup. We

625 reported the overall eight days time series, and the comparison for the across site  
626 variability, the mean seasonal cycle and the weekly deviations (or anomalies) from the  
627 mean seasonal cycle.

628

629

## 630 **Appendix C Median value of site-by-site performance per vegetation and climate type.**

631

632 At follow we reported the median estimate of site-by-site  $R^2$ , RMSE, and absolute bias per  
633 PFT and climate zones.

634

635

## 636 **Acknowledgments**

637 G. Tramontana was supported by the GEOCARBON EU FP7 project (GA 283080). D.  
638 Papale, M. Jung and M. Reichstein thank the support of the BACI H2020 (GA 640176) EU  
639 project. G. Camps-Valls wants to acknowledge the support by an ERC Consolidator Grant  
640 with grant agreement 647423 (SEDAL). K. Ichii was supported by Environment Research  
641 and Technology Development Funds (2-1401) from the Ministry of the Environment of  
642 Japan and the JAXA Global Change Observation Mission (GCOM) project (#115). C. R.  
643 Schwalm was supported by National Aeronautics and Space Administration (NASA) Grants  
644 #NNX12AP74G, #NNX10AG01A, and #NNX11AO08A. M. A. Arain thanks the support of  
645 Natural Sciences and Engineering Research Council (NSREC) of Canada. P. Serrano Ortiz  
646 was partially supported by the Spanish Ministry of Economy and Competitiveness though  
647 the project CGL2014-52838-C2-R(GEISpain). S. Wolf acknowledges support from a Marie  
648 Curie International Outgoing Fellowship (European Commission, grant 300083). This work  
649 used Eddy Covariance data acquired by the FLUXNET community and in particular by the

650 following networks: AmeriFlux (U.S. Department of Energy, Biological and Environmental  
651 Research, Terrestrial Carbon Program (DE-FG02-04ER63917 and DE-FG02-04ER63911)),  
652 AfriFlux, AsiaFlux, CarboAfrica, CarboEuropeIP, CarboItaly, CarboMont, ChinaFlux, Fluxnet-  
653 Canada (supported by CFCAS, NSERC, BIOCAP, Environment Canada, and NRCan),  
654 GreenGrass, KoFlux, LBA, NECC, OzFlux, TCOS-Siberia, USCCC. We acknowledge the  
655 financial support to the eddy covariance data harmonization provided by CarboEuropeIP,  
656 FAO-GTOS-TCO, iLEAPS, Max Planck Institute for Biogeochemistry, National Science  
657 Foundation, University of Tuscia and US Department of Energy and the databasing and  
658 technical support from Berkeley Water Center, Lawrence Berkeley National Laboratory,  
659 Microsoft Research eScience, Oak Ridge National Laboratory, University of California -  
660 Berkeley, University of Virginia.

661

662

## 663 5. References

664

665 Amiro, B. D., Barr, A. G., Barr, J. G., Black, T. A., Gracho, R., Brown, M., Chen, J., Clark, K. L.,  
666 Davis, K. J., Desai, A. R., Dore, S., Engel, V., Fuentes, J. D., Goldstein, A. H., Goulden, M. L.,  
667 Kolb, T. E., Lavigne, M. B., Law, B. E., Margolis, H. A., Martin, T., McCaughey, J. H., Misson,  
668 L., Montes, Helu, M., Noormets, A., Randerson, J. T., Starr, G. and Xiao, J.: Ecosystem  
669 carbon dioxide fluxes after disturbance in forests of North America. J Geophys Res-  
670 Biogeo, 115, G00K02, doi:10.1029/2010JG001390, 2010.

671

672 Alonso Fernández, J.R., DíazMuñiza, C., Garcia, Nieto, P.J., de Cos, Juez, F.J, Sánchez,  
673 Lasheras, F. and Roqueñic, M.N.: Forecasting the cyanotoxins presence in fresh waters: A

674 new model based on genetic algorithms combined with the MARS technique, *Ecol Eng*,  
675 53, 68–78. doi:10.1016/j.ecoleng.2012.12.015, 2013.

676

677 Anav, A., Friedlingstein, P., Kidston, M., Bopp, L., Ciais, P., Cox, P., Jones, C., Jung, M.,  
678 Myneni, R. and Zhu Z.: Evaluating the land and ocean components of the global carbon  
679 cycle in the cmip5 earth system models, *J Climate*, 26, 6801–6843, doi:  
680 <http://dx.doi.org/10.1175/JCLI-D-12-00417.1>, 2013.

681

682 Aubinet, M., Vesala, T. and Papale, D.: *Eddy Covariance: A Practical Guide to*  
683 *Measurement and Data Analysis*, Springer, Dordrecht Heidelberg London New York, 460,  
684 2012.

685

686 Baldocchi, D.: Breathing of the terrestrial biosphere: lessons learned from a global  
687 network of carbon dioxide flux measurement systems, *Aust J Bot*, 56, 1–26,  
688 <http://dx.doi.org/10.1071/BT07151>, 2008.

689

690 Baldocchi, D.: Measuring fluxes of trace gases and energy between ecosystems and the  
691 atmosphere – the state and future of the eddy covariance method, *Global Change Biol*,  
692 20, 3600–3609, DOI: 10.1111/gcb.12649, 2014.

693

694 Beer, C., Reichstein, M., Tomelleri, E., Ciais, P., Jung, M., Carvalhais, N., Rödenbeck, C.,  
695 Arain, A., M., Baldocchi, D., Bonan, B., G., Bondeau, A., Cescatti, A., Lasslop, G., Lindroth,  
696 A., Lomas, M., Luyssaert, S., Margolis, H., Oleson, W. K., Rouspard, O., Veenendaal, E.,  
697 Viovy, N., Woodward, I. F. and Papale, D.: Terrestrial Gross Carbon Dioxide Uptake: Global

698 Distribution and Covariation with Climate, Science, 329, 834-838, doi:  
699 10.1126/science.1184984, 2010.

700

701 Bell, T. W., Menzer, O., Troyo-Diéquez, E. and Oechel, W.: Carbon dioxide exchange over  
702 multiple temporal scales in an arid shrub ecosystem near La Paz, Baja California Sur,  
703 Mexico, Global Change Biol, 18, 2570–2582, doi:10.1111/j.1365-2486.2012.02720.x.,  
704 2012.

705

706 Bonan, G. B., Lawrence, P. J., Oleson, K. W., Levis, S., Jung, M., Reichstein, M., Lawrence,  
707 D. M. and Swenson, S. C.: Improving canopy processes in the Community Land Model  
708 version 4 (CLM4) using global flux fields empirically inferred from FLUXNET data, J  
709 Geophys Res-Bioge, 116, G02014, doi:10.1029/2010JG001593, 2011.

710

711 Breiman, L.: Random Forests, Mach. Learn., 45 (1), 5–32, doi:10.1023/A:1010933404324,  
712 2001.

713

714 Dee, D. P., Uppala, S. M., Simmons, A. J., Berrisford, P., Poli, P., Kobayashi, S., Andrae, U.,  
715 Balmaseda, M. A., Balsamo, G., Bauer, P., Bechtold, P., Beljaars, A. C. M., van de Berg, L.,  
716 Bidlot, J., Bormann, N., Delsol, C., Dragani, R., Fuentes, M., Geer, A. J., Haimberger, L.,  
717 Healy, S. B., Hersbach, H., Hólm, E. V., Isaksen, L., Kållberg, P., Köhler, M., Matricardi, M.,  
718 McNally, A. P., Monge-Sanz, B., M., Morcrette, J.-J., Park, B.-K., Peubey, C., de Rosnay, P.,  
719 Tavolato, C., Thépaut, J.-N. and Vitart, F.: The ERA-Interim reanalysis: configuration and  
720 performance of the data assimilation system, Q.J.R. Meteorol Soc, 137, 553–597, doi:  
721 10.1002/qj.828, 2011.

722

723 Frank, D., Reichstein, M., Bahn, M., Thonicke, K., Frank, D., Mahecha, M. D., Smith, P.,  
 724 Van Der Velde, M., Vicca, S., Babst, F., Beer, C., Buchmann, N., Canadell, J. G., Ciais, P.,  
 725 Cramer, W., Ibrom, A., Miglietta, F., Poulter, B., Ramming, A., Seneviratne, S. I., Walz, A.,  
 726 Wattenbach, M., Zavala, M. A. and Zscheischler, J.: Effects of climate extremes on the  
 727 terrestrial carbon cycle: concepts, processes and potential future impacts, *Global Change*  
 728 *Biol*, 21, 2861–2880, doi: 10.1111/gcb.12916, 2015.  
 729  
 730 Friedman, J. H.: Multivariate Adaptive Regression Splines, *Ann. Statist.*, 19, 1-67,  
 731 doi:10.1214/aos/1176347963, 1991.  
 732  
 733 Fröhlich, B., Rodner, E., Kemmler, M. and Denzler, J.: Large-scale gaussian process  
 734 classification using random decision forests, *S. Mach. Perc.*, 22 (1), 113–120, DOI  
 735 10.1007/s00138-012-0480-y, 2012.  
 736  
 737 Gao, B. C.: NDWI-A Normalized difference water index for remote sensing of vegetation  
 738 liquid water from space, *Remote Sens Environ*, 58, 257-266, doi:10.1016/S0034-  
 739 4257(96)00067-3, 1996.  
 740  
 741 Garnaud, C., Sushama, L. and Arorab, V. K.: The effect of driving climate data on the  
 742 simulated terrestrial carbon pools and fluxes over North America, *Int J Climatol*, 34, 1098-  
 743 1110, DOI: 10.1002/joc.3748, 2014.  
 744  
 745 Giri, C., Zhu, Z. and Reed B.: A comparative analysis of the Global Land Cover 2000 and  
 746 MODIS land cover data sets, *Remote Sens Environ*, 94, 123–132,  
 747 doi:10.1016/j.rse.2004.09.005, 2005

748

749 Gupta, H. V., Kling, H., Yilmaz, K. K. and Martinez, G. F.: Decomposition of the mean  
750 squared error and NSE performance criteria: Implications for improving hydrological  
751 modelling, *J Hydrol*, 20, 80-91, doi:10.1016/j.jhydrol.2009.08.003, 2009.

752

753 Haykin, S.: *Neural Networks – A Comprehensive Foundation* (2nd ed.), Prentice Hall.,  
754 1999.

755

756 Ho, T. K.: The Random Subspace Method for Constructing Decision Forests, *IEEE T Pattern*  
757 *Anal*, 20 (8), 832–844, doi:10.1109/34.709601, 1998.

758

759 Huete, A., Didan, K., Miura, T., Rodriguez, E. P., Gao, X. and Ferreira, L.G.: Overview of the  
760 radiometric and biophysical performance of the MODIS vegetation indices, *Remote Sens*  
761 *Environ*, 83, 195–213, doi:10.1016/S0034-4257(02)00096-2, 2002.

762

763 Ichii, K., Wang, W., Hashimoto, H., Yang, F., Votava, P., Michaelis, A. R. and Nemani, R. R.:  
764 Refinement of rooting depths using satellite-based evapotranspiration seasonality for  
765 ecosystem modeling in California, *Agr Forest Meteorol*, 149, 1907-1918,  
766 doi:10.1016/j.agrformet.2009.06.019, 2009.

767

768 Ichii, K., Suzuki, T., Kato, T., Ito, A., Hajima, T., Ueyama, M., Sasai, T., Hirata, R., Saigusa,  
769 N., Ohtani, Y. and Takagi, K.: Multi-model analysis of terrestrial carbon cycles in Japan:  
770 limitations and implications of model calibration using eddy flux observations,  
771 *Biogeosciences*, 7, 2061–2080, doi:10.5194/bg-7-2061-2010, 2010.

772



773 IPCC: Climate Change 2007: Synthesis Report. Contribution of Working Groups I, II and III  
774 to the Fourth Assessment Report of the Intergovernmental Panel on Climate Change  
775 [Core Writing Team, Pachauri, R.K and Reisinger, A. (eds.)]. IPCC, Geneva, Switzerland,  
776 104, 2007.

777

778 Joiner, J., Yoshida, Y., Vasilkov, A. P., Schaefer, K., Jung, M., Guanter, L., Zhang, Y., Garrity,  
779 S., Middleton, E. M., Huemmrich, K. F., Guh, L. and Belelli Marchesini, L.: The seasonal  
780 cycle of satellite chlorophyll fluorescence observations and its relationship to vegetation  
781 phenology and ecosystem atmosphere carbon exchange, *Remote Sens Environ*, 152, 375–  
782 391, <http://dx.doi.org/10.1016/j.rse.2014.06.022>, 2014.

783

784 Jung, M., and Zscheischler, J.: A Guided Hybrid Genetic Algorithm for Feature Selection  
785 with Expensive Cost Functions, *Procedia Computer Science*, 18, 2337-2346, doi:  
786 10.1016/j.procs.2013.05.405, 2013.

787

788 Jung, M., Verstraete, M., Gobronz, N., Reichstein, M., Papale, D., Bondeau, A., Robustelli,  
789 M. and Pinty, R.: Diagnostic assessment of European gross primary production, *Global*  
790 *Change Biol*, 14, 2349–2364, doi: 10.1111/j.1365-2486.2008.01647.x, 2008.

791

792 Jung, M., Reichstein, M. and Bondeau, A.: Towards global empirical upscaling of FLUXNET  
793 Eddy Covariance observations: validation of a model tree ensemble approach using a  
794 biosphere model, *Biogeosciences*, 6, 2001-2013, doi:10.5194/bg-6-2001-2009, 2009.

795

796 Jung, M., Reichstein, M., Ciais, P., Seneviratne, S. I., Sheffield, J., Goulden, M. L., Bonan,  
797 G., Cescatti, A., Chen, J., de Jeu, R., Dolman, A. J., Eugster, W., Gerten, D., Gianelle, D.,

798 Gobron, N., Heinke, J., Kimball, J., Law, B. E., Montagnani, L., Mu, Q., Mueller, B., Oleson,  
799 K., Papale, D., Richardson, A. D., Rouspard, O., Running, S., Tomelleri, E., Viovy, N.,  
800 Weber, U., Williams, C., Wood, E., Zaehle, S. and Zhang, K.: Recent decline in the global  
801 land evapotranspiration trend due to limited moisture supply, *Nature Letter*, 467, 951-  
802 953, doi:10.1038/nature09396, 2010.

803

804 Jung, M., Reichstein, M., Margolis, H. A., Cescatti, A., Richardson, A. D., Arain, M. A.,  
805 Arneth, A., Bernhofer, C., Bonal, D., Chen, J., Gianelle, D., Gobron, N., Kiely, G., Kutsch,  
806 W., Lasslop, G., Law, B. E., Lindroth, A., Merbold, L., Montagnani, L., Moors, E. J., Papale,  
807 D., Sottocornola, M., Vaccari, F. and Williams, C.: Global patterns of land-atmosphere  
808 fluxes of carbon dioxide, latent heat, and sensible heat derived from eddy covariance,  
809 satellite, and meteorological observations, *Journal of geophys res-Bioge*, 116, G00J07,  
810 doi:10.1029/2010JG001566, 2011.

811

812 Justice, C. O., Townshend, J. R. G., Vermote, E. F., Masuoka, E., Wolfe, R. E., Saleous, N.,  
813 Roy, D. P. and Morisette, J. T.: An overview of MODIS Land data processing and product  
814 status, *Remote Sens Environ*, 83, 3–15, doi:10.1016/S0034-4257(02)00084-6, 2002.

815

816 Kondo, M., Ichii, K., Takagi, H. and Sasakawa, M.: Comparison of the data-driven top-  
817 down and bottom-up global terrestrial CO<sub>2</sub> exchanges: GOSAT CO<sub>2</sub> inversion and  
818 empirical eddy flux upscaling, *Journal of geophys res-Bioge*, 120, 1226–1245,  
819 doi:10.1002/2014JG002866, 2015.

820

821 Lasslop, G., Reichstein, M., Papale, D., Richardson, A. D., Arneth, A., Barr, A., Stoy, P. and  
822 Wohlfahrt, G.: Separation of net ecosystem exchange into assimilation and respiration

823 using a light response curve approach: critical issues and global evaluation, *Global Change*  
824 *Biol*, 16, 187-208, doi:10.1111/j.1365-2486.2009.02041.x, 2010.

825

826 Merbold, L., Ardö, J., Arneth, A., Scholes, R. J., Nouvellon, Y., de Grandcourt, A., Archibald,  
827 S., Bonnefond, J. M., Boulain, N., Brueggemann, N., Bruemmer, C., Cappelaere, B.,  
828 Ceschia, E., El-Khidir, H. A. M., El-Tahir, B. A., Falk, U., Lloyd, J., Kergoat, L., Le Dantec, V.,  
829 Mougin, E., Muchinda, M., Mukelabai, M. M., Ramier, D., Roupsard, O., Timouk, F.,  
830 Veenendaal, E. M. and Kutsch, W. L.: Precipitation as driver of carbon fluxes in 11 African  
831 ecosystems, *Biogeosciences*, 6, 1027–1041, doi:10.5194/bg-6-1027-2009, 2009, 2009.

832

833 Myneni, R.B., Hoffman, S., Knyazikhin, Y., Privette, J.L., Glassy, J., Tian, Y., Wang, Y., Song,  
834 X., Zhang, Y., Smith, G.R., Lotsch, A., Friedl, M., Morisette, J.T., Votava, P., Nemani, R.R.,  
835 and Running, S.W.: Global products of vegetation leaf area and fraction absorbed PAR  
836 from year one of MODIS data, *Remote Sens Environ*, 83, 214–231, doi:10.1016/S0034-  
837 4257(02)00074-3, 2002.

838

839 Nash, J. E. and Sutcliffe J. V.: River flow forecasting through conceptual models part I: A  
840 discussion of principles, *Journal Hydrol*, 10, 282–290, doi:10.1016/0022-1694(70)90255-6,  
841 1970.

842

843 Papale, D. and Valentini, R.: A new assessment of European forests carbon exchanges by  
844 eddy fluxes and artificial neural network spatialization, *Global Change Biol*, 9, 525–535,  
845 doi: 10.1046/j.1365-2486.2003.00609.x, 2003.

846

847 Papale, D., Reichstein, M., Aubinet, M., Canfora, E., Bernhofer, C., Kutsch, W., Longdoz,  
848 B., Rambal, S., Valentini, R., Vesala, T. and Yakir, D.: Towards a standardized processing of  
849 Net Ecosystem Exchange measured with eddy covariance technique: Algorithms and  
850 uncertainty estimation, *Biogeosciences*, 3, 571–583, doi:10.5194/bg-3-571-2006, 2006.

851

852 Papale, D., Black, T. A., Carvalhais, N., Cescatti, A., Chen, J., Jung, M., Kiely, G., Lasslop, G.,  
853 Mahecha, D. M., Margolis, H., Merbold, L., Montagnani, L., Moors, E., Olesen, J. E.,  
854 Reichstein, M., Tramontana, G., van Gorsel, E., Wohlfahrt, G. and Ráduly, B.: Effect of  
855 spatial sampling from European flux towers for estimating carbon and water fluxes with  
856 artificial neural networks, *Journal of geophys res-Biogeophys*, 120, 1941-1957,doi:  
857 10.1002/2015JG00299, 2015.

858

859 Paruelo, J. M., Piñero, G., Oyonarte, C., Alcaraz, D., Cabello, J. and Escribano, P.: Temporal  
860 and spatial patterns of ecosystem functioning in protected arid areas in southeastern  
861 Spain, *Appl Veg Sci*, 8, 93–102, doi: [http://dx.doi.org/10.1658/1402-](http://dx.doi.org/10.1658/1402-2001(2005)008[0093:TASPOE]2.0.CO;2)  
862 [2001\(2005\)008\[0093:TASPOE\]2.0.CO;2](http://dx.doi.org/10.1658/1402-2001(2005)008[0093:TASPOE]2.0.CO;2), 2005.

863

864 Piao, S., Sitch, S., Ciais, P., Friedlingstein, P., Peylin, P., Wang, X., Ahlström, A., Anav, A.,  
865 Canadell, J. G., Cong, N., Huntingford, C., Jung, M., Levis, S., Levy, P. E., Li, J., Lin, X.,  
866 Lomas, M. R., Lu, M., Luo, Y., Ma, Y., Myneni, R. B., Poulter, B., Sun, Z., Wang, T., Viovy,  
867 N., Zaehle, S. and Zeng, N.: Evaluation of terrestrial carbon cycle models for their  
868 response to climate variability and to CO<sub>2</sub> trends, *Glob Change Biol.*, 19, 2117–2132,  
869 doi:10.1111/gcb.12187, 2013.

870

871 Rasmussen C. E. and Williams C. K. I.: Gaussian Processes for Machine Learning, the MIT  
872 Press, ISBN 026218253X, 2006.

873

874 Reichstein, M., Falge, E., Baldocchi, D., Papale, D., Aubinet, M., Berbigier, P., Bernhofer,  
875 C., Buchmann, N., Gilmanov, T., Granier, A., Grünwald, T., Havránková, K., Ilvesniemi, H.,  
876 Janous, D., Knohl, A., Laurila, T., Lohila, A., Loustau, D., Matteucci, G., Meyers, T.,  
877 Miglietta, F., Ourcival, J.-M., Pumpanen, J., Rambal, S., Rotenberg, E., Sanz, M., Tenhunen,  
878 J., Seufert, G., Vaccari, F., Vesala, T., Yakir, D., and Valentini R.: On the separation of net  
879 ecosystem exchange into assimilation and ecosystem respiration: Review and improved  
880 algorithm, *Global Change Biol*, 11, 1424–1439, doi:10.1111/j.1365-2486.2005.001002.x,  
881 2005.

882

883 Reich, P. B.: The carbon dioxide exchange, *Science*, 329, 774-775,  
884 <http://dx.doi.org/10.1126/science.1194353>, 2010.

885

886 Schwalm C. R., Williams C. A., Schaefer K., Anderson R., Arain M. A., Baker I., Barr A.,  
887 Black T. A., Chen G., Chen J. M., Ciais P., Davis K. J., Desai A., Dietze M., Dragoni D., Fischer  
888 M. L., Flanagan L. B., Grant R., Gu L., Hollinger D., Izaurrealde R. C., Kucharik C., Lafleur P.,  
889 Law B. E., Li L., Li Z., Liu S., Lokupitiya E., Luo Y., Ma S., Margolis H., Matamala R.,  
890 McCaughey H., Monson R. K., Oechel W. C., Peng C., Poulter B., Price D. T., Riciutto D. M.,  
891 Riley W., Sahoo A. K., Sprintsin M., Sun J., TI. H., Tonitto C., Verbeeck H., Verma S. B.: A  
892 model-data intercomparison of CO<sub>2</sub> exchange across North America: Results from the  
893 North American Carbon Program site synthesis, *Journal of geophys res-Biogeo*, 115,  
894 G00H05, doi:10.1029/2009JG001229, 2010.

895

896 Schaaf, C. B., Gao, F., Strahler, A. H., Lucht, W., Li, X., Tsang, T., Strugnell, N. C., Zhang, X.,  
897 Jin, Y., Muller, J-P., Lewis, P., Barnsley, M., Hobson, P., Disney, M., Roberts, G.,  
898 Dunderdale, M., Doll, C., d'Entremont, R. P., Hu, B., Liang, S., Privette, J. L. and Roy, D.:  
899 First operational BRDF, albedo nadir reflectance products from MODIS, *Remote Sens*  
900 *Environ*, 83, 135–148, doi:10.1016/S0034-4257(02)00091-3, 2002.

901

902 Shawe-Taylor, J. and Cristianini, N.: *Kernel Methods for Pattern Analysis*, Cambridge  
903 University Press, 2004.

904

905 Shirmohammadi, R., Ghorbani, B., Hamed, M., Hamed, M. H., and Romeo, L. M.:  
906 Optimization of mixed refrigerant systems in low temperature applications by means of  
907 group method of data handling (GMDH), *Journal of Natural Gas Science and Engineering*,  
908 26, 303-312, doi:10.1016/j.jngse.2015.06.028, 2015.

909

910 Sims, D. A., Rahman, A. F., Cordova, V. D., El-Masri, B. Z., Baldocchi, D. D., Bolstad, P. V.,  
911 Flanagan, L. B., Goldstein, A. H., Hollinger, D. Y., Misson, L., Monson, R. K., Oechel, W. C.,  
912 Schmid, H. P., Wofsy, S. C. and Xu, L.: A new model of gross primary productivity for  
913 North American ecosystems based solely on the enhanced vegetation index and land  
914 surface temperature from MODIS, *Remote Sens Environ*, 12, 1633–1646,  
915 doi:10.1016/j.rse.2007.08.004, 2008.

916

917 Thornton, P. E., Law, B. E., Gholz, H. L., Clark, K. L., Falge, E., Ellsworth, D. S., Goldstein, A.  
918 H., Monson, R. K., Hollinger, D., Falk, M., Chen, J., Sparks, J. P.: Modeling and measuring  
919 the effects of disturbance history and climate on carbon and water budgets in evergreen

920 needleleaf forests, *Agr Forest Meteorol*, 113, 185-222, doi:10.1016/S0168-  
921 1923(02)00108-9, 2002.

922

923 Tramontana, G., Ichii, K., Camps-Valls, G., Tomelleri, E. and Papale, D.: Uncertainty  
924 analysis of gross primary production upscaling using Random Forests, remote sensing and  
925 eddy covariance data, *Remote Sens Environ*, 168, 360–373,  
926 doi:10.1016/j.rse.2015.07.015, 2015.

927

928 Ungaro, F., Calzolari, C. and Busoni, E: Development of pedotransfer functions using a  
929 group method of data handling for the soil of the Pianura Padano–Veneta region of North  
930 Italy: water retention properties, *Geoderma*, 124, 293–317,  
931 doi:10.1016/j.geoderma.2004.05.007, 2005.

932

933 Valentini, R., Arneth, A., Bombelli, A., Castaldi, S., Cazzolla Gatti, R., Chevallier, F., Ciais, P.,  
934 Grieco, E., Hartmann, J., Henry, M., Houghton, R. A., Jung, M., Kutsch, W. L., Malhi, Y.,  
935 Mayorga, E., Merbold, L., Murray-Tortarolo, G., Papale, D., Peylin, P., Poulter, B.,  
936 Raymond, P. A., Santini, M., Sitch, S., Vaglio Laurin, G., van der Werf, G. R., Williams, C. A.  
937 and Scholes, R. J.: A full greenhouse gases budget of Africa: synthesis, uncertainties, and  
938 vulnerabilities, *Biogeosciences*, 11, 381-407, doi:10.5194/bg-11-381-2014., 2014.

939

940 Vapnik, V., Golowich, S. and Smola, A.: Support vector method for function  
941 approximation, regression estimation, and signal processing, *Adv Neur In*, 9, 281–287,  
942 1997.

943

944 Verrelst, J., Muñoz, J., Alonso, L., Delegido, J., Rivera, J., Camps-Valls, G., and Moreno, J.:  
 945 Machine learning regression algorithms for biophysical parameter retrieval:  
 946 Opportunities for Sentinel-2 and -3, *Remote Sens Environ*, 118, 127–139, 2012  
 947  
 948 Verrelst, J., Camps-Valls, G., Muñoz, J., Rivera, J. P., Veroustraete, F., Clevers, J. P. G. W.  
 949 and Moreno, J.: Optical remote sensing and the retrieval of terrestrial vegetation bio-  
 950 geophysical properties – A review, *ISPRS J Photogramm*,  
 951 doi:10.1016/j.isprsjprs.2015.05.005, 108, 273-290, 2015  
 952  
 953 Wan, Z., Zhang, Y., Zhang, Q. and Li, Z. L.: Validation of the land-surface temperature  
 954 products retrieved from Terra Moderate Resolution Imaging Spectroradiometer data,  
 955 *Remote Sens Environ*, 83, 163–180, doi: 10.1016/S0034-4257(02)00093-7, 2002.  
 956  
 957 Wolf, S., Eugster, W., Potvin, C. and Buchmann, N.: Strong seasonal variations in net  
 958 ecosystem CO<sub>2</sub> exchange of a tropical pasture and afforestation in Panama, *Agr Forest*  
 959 *Meteorol*, 151, 1139-1151, doi:10.1016/j.agrformet.2011.04.002, 2011.  
 960  
 961 Xiao, J., Zhuang, Q., Baldocchi, D. D., Law, B. E., Richardson, A. D., Chen, J., Oren, R., Starr,  
 962 G., Noormets, A., Ma, S., Verma, S. B., Wharton, S., Wofsy, S. C., Bolstad, P. V., Burns, S.  
 963 P., Cook, D. R., Curtis, P. S., Drake, B. G., Falk, M., Fischer, M. L., Foster, D. R., Gu, L.,  
 964 Hadley, J. L., Hollinger, D. Y., Katul, G. G., Litvak, M., Martin, T. A., Matamala, R., McNulty,  
 965 S., Meyers, T. P., Monson, R. K., Munger, J. W., Oechel, W. C., Paw U, K. T., Schmid, H. P.,  
 966 Scott, R. L., Sun, G., Suyker, A. E., Torn, M. S.: Estimation of net ecosystem carbon  
 967 exchange for the conterminous United States by combining MODIS and AmeriFlux data,  
 968 *Agr Forest Meteorol*, 148, 1827-1847, doi:10.1016/j.agrformet.2008.06.015, 2008.



969

970 Xiao, J., Zhuang, Q., Law, B. E., Chen, J., Baldocchi, D. D., Cook, D. R., Oren, R., Richardson,  
971 A. D., Wharton, S., Ma, S., Martin, T. A., Verma, S. B., Suyker, A. E., Scott, R. L., Monson, R.  
972 K., Litvak, M., Hollinger, D. Y., Sun, G., Davis, K. J., Bolstad, P. V., Burns, S. P., Curtis, P. S.,  
973 Drake, B. G., Falk, M., Fischer, M. L., Foster, D. R., Gu, L., Hadley, J. L., Katul, G. G.,  
974 Matamala, R., McNulty, S., Meyers, T., P., Munger, J. W., Noormets, A., Oechel, W. C.,  
975 Paw, K. T., Schmid, H. P., Starr, G. Torn, M. S. and Wofsy, S. C.: A continuous measure of  
976 gross primary production for the conterminous United States derived from MODIS and  
977 AmeriFlux data, *Remote Sens Environ*, 114, 576–591, doi: 10.1016/j.rse.2009.10.013,  
978 2010.

979

980 Xiao, X., Boles, S., Liu, J. Y., Zhuang, D. F. and Liu, M. L.: Characterization of forest types in  
981 Northeastern China, using multi-temporal SPOT-4 VEGETATION sensor data, *Remote Sens*  
982 *Environ*, 82, 335–348, doi:10.1016/S0034-4257(02)00051-2, 2002.

983

984 Yang, F., White, M. A., Michaelis, A. R., Ichii, K., Hashimoto, H., Votava, P., Zhu, A. X. and  
985 Nemani, R. R.: Prediction of continental-scale evapotranspiration by combining MODIS  
986 and AmeriFlux data through support Vector machine, *IEEE T. Geosci Remote*, 44, 3452-  
987 3461, doi: 10.1109/TGRS.2006.876297, 2006.

988

989 Yang, F., Ichii, K., White, M. A., Hashimoto, H., Michaelis, A. R., Votava, P., Zhu, A-X.,  
990 Huete, A., Running, S. W., and Nemani, R. R.: Developing a continental-scale measure of  
991 gross primary production by combining MODIS and AmeriFlux data through Support  
992 Vector Machine approach, *Remote Sens Environ*, 110, 109–122,  
993 doi:10.1016/j.rse.2007.02.016, 2007.

994

995 Yebra, M., Van Dijk, A. I. J. M., Leuning, R. and Guerschman, J. P.: Global vegetation gross  
996 primary production estimation using satellite-derived light-use efficiency and canopy  
997 conductance, *Remote Sens Environ*, 163, 206–216, doi:10.1016/j.rse.2015.03.016, 2015.

998

999 Yuan, W., Liu, S., Yu, G., Bonnefond, J-M., Chen, J., Davis, K., Desai, A. R., Goldstein, A. H.,  
1000 Gianelle, D., Rossi, F., Suyker, A. E. and Verma, S. B.: Global estimates of  
1001 evapotranspiration and gross primary production based on MODIS and global  
1002 meteorology data, *Remote Sens Environ*, 114, 1416–1431, doi:10.1016/j.rse.2010.01.022,  
1003 2010.

1004

1005 Zhao, Y., Ciais, P., Pylin, P., Viovy, N., Longdoz, B., Bonnefond, J. M., Rambal, S., Klumpp,  
1006 K., Olioso, A., Cellier, P., Maigna, F., Eglin, T. and Calvet, J. C.: How errors on  
1007 meteorological variables impact simulated ecosystem fluxes: a case study for six French  
1008 sites, *Biogeosciences*, 9, 2537-2564, doi:10.5194/bg-9-2537-2012, 2012.

1009 **Table 1.** Distribution of flux tower sites across plant functional types (PFT) and climate zones.

| PFT                         | N° of sites | Climate zone                | N° of sites |
|-----------------------------|-------------|-----------------------------|-------------|
| Evergreen needleleaf forest | 66          | Temperate                   | 111         |
| Grassland                   | 38          | Subtropical - Mediterranean | 47          |
| Cropland                    | 27          | Boreal                      | 34          |
| Deciduous broadleaf forest  | 24          | Tropical                    | 14          |
| Evergreen broadleaf forest  | 19          | Dry                         | 13          |
| Wetland                     | 17          | Arctic                      | 5           |
| Shrubland                   | 12          |                             |             |
| Mixed forest                | 11          |                             |             |
| Savannah                    | 10          |                             |             |

1010 **Table 2.** Selected predictors for both setup for carbon fluxes (GPP, TER and NEE) and energy  
 1011 fluxes (H, LE and Rn). List of acronyms: Enhanced Vegetation Index (EVI), fraction of  
 1012 photosynthetically active radiation absorbed by a canopy (fPAR), Leaf Area Index (LAI), daytime  
 1013 Land Surface Temperature (LST<sub>Day</sub>) and nighttime Land Surface Temperature (LST<sub>Night</sub>), Middle  
 1014 Infrared Reflectance (band 7) (MIR<sup>(1)</sup>), Normalized Difference Vegetation Index (NDVI),  
 1015 Normalized Difference Water Index (NDWI), Plant Functional Type (PFT), incoming global  
 1016 Radiation (Rg), top of atmosphere potential Radiation (Rpot), Index of Water Availability (IWA),  
 1017 Relative humidity (Rh), Water Availability Index lower (WAI<sub>L</sub>), and upper (WAI<sub>U</sub>) (for details see  
 1018 supplementary material, Sect. S3), Mean Seasonal Cycle (MSC). Interaction between A and B is  
 1019 shown as (A, B)

| Setup    | Type of variability             | Carbon fluxes                          | Energy fluxes                               |
|----------|---------------------------------|----------------------------------------|---------------------------------------------|
| RS       | Spatial                         | PFT                                    | PFT                                         |
|          |                                 | Amplitude of MSC of EVI                | Maximum of MSC of (fPAR, Rg)                |
|          |                                 | Amplitude of MSC of MIR <sup>(1)</sup> | Minimum of MSC of (NDVI, Rg)                |
|          | Spatial & seasonal              | Maximum of MSC of LST <sub>Day</sub>   |                                             |
|          |                                 | MSC LAI                                | MSC of (EVI, LST)                           |
|          |                                 |                                        | Rpot                                        |
|          |                                 | NDWI                                   | Rg                                          |
|          | Spatial, seasonal & interannual | LST <sub>Day</sub>                     | LST <sub>Day</sub>                          |
|          |                                 | LST <sub>Night</sub>                   | Anomalies of LST <sub>Night</sub>           |
|          |                                 | (NDVI, Rg)                             | Anomalies of (EVI, LST)                     |
| RS+METEO | Spatial                         | PFT                                    | PFT                                         |
|          |                                 | Amplitude of MSC of NDVI               | Maximum of MSC of (NDVI, WAI <sub>U</sub> ) |
|          |                                 | Amplitude of MSC of band               | Mean of MSC of band 6                       |

|                           |                                   |                                 |
|---------------------------|-----------------------------------|---------------------------------|
|                           | 4 BRDF reflectance <sup>(2)</sup> | BRDF reflectance <sup>(2)</sup> |
|                           | Minimum of MSC of NDWI            |                                 |
|                           | Amplitude of MSC of               |                                 |
|                           | (NDVI, WAI <sub>L</sub> )         |                                 |
| Spatial & Seasonal        | MSC of LST <sub>Night</sub>       | Rpot                            |
|                           | MSC of (FPAR, LST)                | MSC of NDWI                     |
|                           | MSC of (NDVI, Rg)                 | MSC of LST <sub>Night</sub>     |
|                           |                                   | MSC of (NDVI, Rg, IWA)          |
| Spatial & Seasonal & Tair |                                   | Rain                            |
| Interannual               |                                   | Rg                              |
|                           |                                   | Rh                              |

---

1020 <sup>(1)</sup> derived from the MOD13 product; <sup>(2)</sup> derived from MCD43 product.

1021 **Table 3.** Statistics of the accuracy of predictions of carbon and energy fluxes made by the  
 1022 ensemble median estimate based on RS and RS+METEO. For RMSE and BIAS, the reference units are  
 1023  $\text{gCm}^{-2}\text{d}^{-1}$  and  $\text{MJm}^{-2}\text{d}^{-1}$ , in the case of carbon fluxes (GPP, TER and NEE) and energy fluxes (H, LE and Rn)  
 1024 respectively.

| Flux             | RS   |      |      |      |       | RS+METEO |      |        |      |       |
|------------------|------|------|------|------|-------|----------|------|--------|------|-------|
|                  | MEF  | RMSE | P    | ROV  | BIAS  | MEF      | RMSE | $\rho$ | ROV  | BIAS  |
| GPP <sub>R</sub> | 0.71 | 1.56 | 0.85 | 0.69 | -0.02 | 0.70     | 1.59 | 0.84   | 0.73 | 0.09  |
| GPP <sub>L</sub> | 0.71 | 1.53 | 0.84 | 0.68 | -0.02 | 0.71     | 1.54 | 0.84   | 0.74 | 0.09  |
| TER <sub>R</sub> | 0.64 | 1.14 | 0.80 | 0.61 | -0.01 | 0.64     | 1.15 | 0.80   | 0.69 | 0.09  |
| TER <sub>L</sub> | 0.60 | 1.18 | 0.77 | 0.56 | -0.01 | 0.63     | 1.14 | 0.79   | 0.66 | 0.08  |
| NEE              | 0.46 | 1.24 | 0.68 | 0.39 | 0.04  | 0.43     | 1.28 | 0.65   | 0.40 | -0.02 |
| H                | 0.79 | 1.36 | 0.89 | 0.71 | -0.02 | 0.79     | 1.37 | 0.89   | 0.75 | 0.02  |
| LE               | 0.76 | 1.37 | 0.87 | 0.71 | -0.07 | 0.75     | 1.39 | 0.87   | 0.73 | -0.01 |
| Rn               | 0.92 | 1.51 | 0.96 | 0.90 | -0.01 | 0.91     | 1.55 | 0.96   | 0.93 | 0.08  |

1025

**Table 4:** Mean values of the determination coefficient ( $R^2$ ) by the pair-wise comparison of the models output and their residuals. We compared different ML and same drivers (RS and RS+METEO respectively) or the same ML and different drivers (RS vs RS+METEO). Numbers in brackets are the standard deviation of  $R^2$ . All correlations are statistically significant ( $p < 0.001$ ).

| Fluxes                 | Correlation <sup>between</sup> among models output s |             |                   | Correlation <sup>between</sup> among models residuals |             |                   |
|------------------------|------------------------------------------------------|-------------|-------------------|-------------------------------------------------------|-------------|-------------------|
|                        | RS                                                   | RS+METEO    | RS vs<br>RS+METEO | RS                                                    | RS+METEO    | RS vs<br>RS+METEO |
| <b>GPP<sub>R</sub></b> | 0.95 (0.02)                                          | 0.95 (0.02) | 0.89 (0.02)       | 0.88 (0.04)                                           | 0.87 (0.04) | 0.74 (0.04)       |
| <b>GPP<sub>L</sub></b> | 0.95 (0.02)                                          | 0.94 (0.02) | 0.88 (0.02)       | 0.88 (0.04)                                           | 0.86 (0.04) | 0.72 (0.04)       |
| <b>TER<sub>R</sub></b> | 0.91 (0.03)                                          | 0.94 (0.03) | 0.86 (0.04)       | 0.86 (0.05)                                           | 0.88 (0.05) | 0.75 (0.06)       |
| <b>TER<sub>L</sub></b> | 0.92 (0.03)                                          | 0.93 (0.03) | 0.85 (0.03)       | 0.89 (0.04)                                           | 0.88 (0.05) | 0.77 (0.05)       |
| <b>NEE</b>             | 0.84 (0.06)                                          | 0.84 (0.07) | 0.75 (0.08)       | 0.88 (0.05)                                           | 0.87 (0.06) | 0.80 (0.06)       |
| <b>H</b>               | 0.94 (0.02)                                          | 0.96 (0.02) | 0.93 (0.03)       | 0.80 (0.06)                                           | 0.87 (0.05) | 0.76 (0.08)       |
| <b>LE</b>              | 0.94 (0.02)                                          | 0.96 (0.01) | 0.90 (0.02)       | 0.83 (0.05)                                           | 0.88 (0.04) | 0.73 (0.04)       |
| <b>Rn</b>              | 0.98 (0.01)                                          | 0.99 (0.00) | 0.97 (0.01)       | 0.79 (0.08)                                           | 0.86 (0.03) | 0.71 (0.12)       |

1032 **Table 5:**  $R^2$  and RMSE for the comparison <sup>between</sup> among sites, mean seasonal cycle and anomalies. The  
 1033 last two columns show the consistency between the median estimates of the two setups. For  
 1034 RMSE, the reference units are  $\text{gCm}^{-2}\text{d}^{-1}$  and  $\text{MJm}^{-2}\text{d}^{-1}$ , in the case of carbon fluxes (GPP, TER and  
 1035 NEE) and energy fluxes (H, LE and Rn) respectively.

| Fluxes              | RS vs. OBS |      | RS+METEO vs. OBS |      | RS vs. RS+METEO |      |
|---------------------|------------|------|------------------|------|-----------------|------|
|                     | $R^2$      | RMSE | $R^2$            | RMSE | $R^2$           | RMSE |
| Across-sites        |            |      |                  |      |                 |      |
| GPP <sub>R</sub>    | 0.78       | 0.80 | 0.77             | 0.82 | 0.95            | 0.34 |
| GPP <sub>L</sub>    | 0.78       | 0.77 | 0.79             | 0.75 | 0.94            | 0.36 |
| TER <sub>R</sub>    | 0.68       | 0.73 | 0.61             | 0.81 | 0.92            | 0.32 |
| TER <sub>L</sub>    | 0.72       | 0.60 | 0.71             | 0.61 | 0.92            | 0.27 |
| NEE                 | 0.48       | 0.61 | 0.46             | 0.61 | 0.83            | 0.22 |
| H                   | 0.81       | 0.68 | 0.81             | 0.68 | 0.97            | 0.25 |
| LE                  | 0.79       | 0.74 | 0.75             | 0.80 | 0.93            | 0.33 |
| Rn                  | 0.80       | 0.93 | 0.79             | 0.96 | 0.96            | 0.38 |
| Mean Seasonal Cycle |            |      |                  |      |                 |      |
| GPP <sub>R</sub>    | 0.76       | 1.03 | 0.77             | 1.02 | 0.93            | 0.48 |
| GPP <sub>L</sub>    | 0.77       | 1.00 | 0.77             | 0.99 | 0.93            | 0.50 |
| TER <sub>R</sub>    | 0.71       | 0.62 | 0.71             | 0.62 | 0.92            | 0.29 |
| TER <sub>L</sub>    | 0.67       | 0.64 | 0.68             | 0.63 | 0.92            | 0.29 |
| NEE                 | 0.61       | 0.83 | 0.59             | 0.84 | 0.93            | 0.24 |
| H                   | 0.86       | 0.89 | 0.86             | 0.87 | 0.97            | 0.36 |
| LE                  | 0.87       | 0.79 | 0.87             | 0.79 | 0.95            | 0.45 |
| Rn                  | 0.98       | 0.74 | 0.98             | 0.74 | 0.99            | 0.43 |
| Anomalies           |            |      |                  |      |                 |      |
| GPP <sub>R</sub>    | 0.18       | 0.67 | 0.12             | 0.68 | 0.38            | 0.32 |



|                  |      |      |      |      |      |      |
|------------------|------|------|------|------|------|------|
| GPP <sub>L</sub> | 0.16 | 0.67 | 0.11 | 0.68 | 0.37 | 0.31 |
| TER <sub>R</sub> | 0.14 | 0.48 | 0.15 | 0.48 | 0.36 | 0.17 |
| TER <sub>L</sub> | 0.10 | 0.58 | 0.13 | 0.57 | 0.35 | 0.18 |
| NEE              | 0.13 | 0.56 | 0.13 | 0.55 | 0.43 | 0.20 |
| H                | 0.43 | 0.81 | 0.41 | 0.81 | 0.77 | 0.34 |
| LE               | 0.21 | 0.78 | 0.21 | 0.77 | 0.46 | 0.32 |
| Rn               | 0.57 | 0.81 | 0.54 | 0.83 | 0.84 | 0.41 |

---

1036

1037 **Table A1:** Accuracy of carbon and energy fluxes predicted by machine learning methods based on  
 1038 RS and RS+METEO dataset. The median value of methods and the variability (in brackets)  
 1039 estimated as the median absolute deviation (MAD) from the median multiplied per 1.4826 (as  
 1040 reported in Jung et al., 2009) were reported.

| FLUXES            | RS             |                |                | RS+METEO       |                |                |
|-------------------|----------------|----------------|----------------|----------------|----------------|----------------|
|                   | MEF            | RMSE           | Abs BIAS       | MEF            | RMSE           | Abs BIAS       |
| GPP               | 0.698 (±0.012) | 1.604 (±0.033) | 0.022 (±0.019) | 0.694 (±0.012) | 1.614 (±0.032) | 0.073 (±0.011) |
| GPP <sub>HB</sub> | 0.700 (±0.009) | 1.564 (±0.024) | 0.023 (±0.024) | 0.701 (±0.008) | 1.561 (±0.020) | 0.083 (±0.011) |
| TER               | 0.612 (±0.022) | 1.183 (±0.033) | 0.026 (±0.025) | 0.623 (±0.005) | 1.166 (±0.008) | 0.089 (±0.033) |
| TER <sub>HB</sub> | 0.571 (±0.016) | 1.218 (±0.023) | 0.019 (±0.017) | 0.609 (±0.001) | 1.163 (±0.002) | 0.079 (±0.017) |
| NEE               | 0.433 (±0.017) | 1.270 (±0.019) | 0.024 (±0.021) | 0.407 (±0.029) | 1.298 (±0.032) | 0.014 (±0.003) |
| H                 | 0.767 (±0.015) | 1.426 (±0.047) | 0.014 (±0.005) | 0.776 (±0.008) | 1.397 (±0.025) | 0.022 (±0.009) |
| LE                | 0.739 (±0.015) | 1.418 (±0.042) | 0.052 (±0.046) | 0.734 (±0.003) | 1.434 (±0.009) | 0.023 (±0.008) |
| Rn                | 0.909 (±0.009) | 1.589 (±0.082) | 0.030 (±0.025) | 0.908 (±0.008) | 1.600 (±0.070) | 0.073 (±0.015) |

1041



1042 **Table C1.** Median site-by-site  $R^2$  of the carbon fluxes per PFT and climate zones. ENF is vvergreen needle leaf forest, DBF deciduous broadleaf forest, EBF Evergreen broadleaf  
1043 forest, MF mixed forest, SHR shrubland, SAV Savannah, GRA Grassland, CRO cropland, WET Wetland, Trop Tropical, SubTrop Subtropical, Dry Dryland, Tmp Temperate, TmpCont  
1044 Temperate-continental, Bor Boreal, Cold cold environment or Iceland covered by ice.

| CAT     | GPP <sub>R</sub> |             | GPP <sub>L</sub> |             | TER <sub>R</sub> |             | TER <sub>L</sub> |             | NEE         |             |
|---------|------------------|-------------|------------------|-------------|------------------|-------------|------------------|-------------|-------------|-------------|
|         | RS               | RS+METEO    | RS               | RS+METEO    | RS               | RS+METEO    | RS               | RS+METEO    | RS          | RS+METEO    |
| ENF     | 0.87 (0.10)      | 0.86 (0.10) | 0.85 (0.12)      | 0.86 (0.12) | 0.81 (0.15)      | 0.85 (0.11) | 0.75 (0.24)      | 0.76 (0.20) | 0.50 (0.34) | 0.55 (0.30) |
| DBF     | 0.89 (0.07)      | 0.87 (0.09) | 0.87 (0.07)      | 0.88 (0.08) | 0.81 (0.12)      | 0.83 (0.13) | 0.76 (0.14)      | 0.76 (0.14) | 0.72 (0.16) | 0.68 (0.17) |
| EBF     | 0.50 (0.29)      | 0.48 (0.20) | 0.48 (0.29)      | 0.44 (0.28) | 0.34 (0.34)      | 0.49 (0.35) | 0.15 (0.18)      | 0.29 (0.20) | 0.26 (0.23) | 0.24 (0.26) |
| MF      | 0.91 (0.06)      | 0.95 (0.02) | 0.91 (0.03)      | 0.95 (0.04) | 0.85 (0.10)      | 0.90 (0.07) | 0.84 (0.10)      | 0.86 (0.15) | 0.73 (0.10) | 0.75 (0.09) |
| SHR     | 0.67 (0.30)      | 0.71 (0.28) | 0.67 (0.36)      | 0.72 (0.23) | 0.80 (0.13)      | 0.78 (0.24) | 0.68 (0.18)      | 0.66 (0.38) | 0.37 (0.38) | 0.41 (0.31) |
| SAV     | 0.75 (0.13)      | 0.70 (0.13) | 0.72 (0.05)      | 0.67 (0.17) | 0.65 (0.07)      | 0.72 (0.11) | 0.55 (0.16)      | 0.61 (0.10) | 0.38 (0.20) | 0.34 (0.29) |
| GRA     | 0.69 (0.27)      | 0.62 (0.33) | 0.69 (0.25)      | 0.60 (0.32) | 0.70 (0.25)      | 0.73 (0.25) | 0.66 (0.20)      | 0.72 (0.21) | 0.40 (0.29) | 0.36 (0.30) |
| CRO     | 0.58 (0.41)      | 0.44 (0.36) | 0.56 (0.41)      | 0.45 (0.31) | 0.78 (0.17)      | 0.76 (0.15) | 0.68 (0.22)      | 0.65 (0.23) | 0.35 (0.46) | 0.33 (0.43) |
| WET     | 0.87 (0.11)      | 0.91 (0.07) | 0.85 (0.12)      | 0.87 (0.09) | 0.78 (0.19)      | 0.83 (0.14) | 0.65 (0.17)      | 0.74 (0.20) | 0.64 (0.16) | 0.61 (0.24) |
| Trop    | 0.32 (0.46)      | 0.40 (0.39) | 0.63 (0.23)      | 0.31 (0.32) | 0.25 (0.23)      | 0.34 (0.47) | 0.11 (0.13)      | 0.26 (0.14) | 0.28 (0.35) | 0.21 (0.30) |
| SubTrop | 0.64 (0.26)      | 0.66 (0.28) | 0.65 (0.26)      | 0.65 (0.24) | 0.64 (0.25)      | 0.66 (0.26) | 0.52 (0.24)      | 0.55 (0.28) | 0.39 (0.37) | 0.39 (0.26) |
| Dry     | 0.47 (0.27)      | 0.40 (0.33) | 0.50 (0.25)      | 0.38 (0.30) | 0.62 (0.25)      | 0.62 (0.38) | 0.55 (0.19)      | 0.55 (0.39) | 0.21 (0.29) | 0.11 (0.14) |
| Tmp     | 0.81 (0.19)      | 0.74 (0.24) | 0.83 (0.14)      | 0.78 (0.22) | 0.78 (0.13)      | 0.77 (0.18) | 0.68 (0.20)      | 0.72 (0.17) | 0.56 (0.28) | 0.47 (0.34) |
| TmpCont | 0.86 (0.09)      | 0.82 (0.16) | 0.84 (0.11)      | 0.80 (0.17) | 0.81 (0.12)      | 0.78 (0.14) | 0.75 (0.17)      | 0.76 (0.15) | 0.54 (0.42) | 0.53 (0.36) |
| Bor     | 0.90 (0.07)      | 0.90 (0.07) | 0.92 (0.06)      | 0.89 (0.07) | 0.90 (0.05)      | 0.91 (0.04) | 0.86 (0.08)      | 0.89 (0.06) | 0.59 (0.31) | 0.59 (0.25) |
| Cold    | 0.56 (0.57)      | 0.50 (0.56) | 0.49 (0.62)      | 0.46 (0.59) | 0.84 (0.20)      | 0.86 (0.13) | 0.50 (0.38)      | 0.55 (0.23) | 0.47 (0.56) | 0.45 (0.57) |

1045

1046 **Table C2.** Median site-by-site RMSE of the carbon fluxes per PFT and climate zones. ENF is svergreen needle leaf forest, DBF deciduous broadleaf forest, EBF Evergreen broadleaf  
1047 forest, MF mixed forest, SHR shrubland, SAV Savannah, GRA Grassland, CRO cropland, WET Wetland, Trop Tropical, SubTrop Subtropical, Dry Dryland, Tmp Temperate, TmpCont  
1048 Temperate-continental, Bor Boreal, Cold cold environment or Iceland covered by ice.

| CAT     | GPP <sub>R</sub> (gCm <sup>-2</sup> d <sup>-1</sup> ) |             | GPP <sub>L</sub> (gCm <sup>-2</sup> d <sup>-1</sup> ) |             | TER <sub>R</sub> (gCm <sup>-2</sup> d <sup>-1</sup> ) |             | TER <sub>L</sub> (gCm <sup>-2</sup> d <sup>-1</sup> ) |             | NEE (gCm <sup>-2</sup> d <sup>-1</sup> ) |             |
|---------|-------------------------------------------------------|-------------|-------------------------------------------------------|-------------|-------------------------------------------------------|-------------|-------------------------------------------------------|-------------|------------------------------------------|-------------|
|         | RS                                                    | RS+METEO    | RS                                                    | RS+METEO    | RS                                                    | RS+METEO    | RS                                                    | RS+METEO    | RS                                       | RS+METEO    |
| ENF     | 1.05 (0.60)                                           | 1.12 (0.60) | 1.04 (0.59)                                           | 1.14 (0.66) | 0.82 (0.50)                                           | 0.80 (0.52) | 0.87 (0.60)                                           | 0.91 (0.68) | 0.87 (0.51)                              | 0.86 (0.53) |
| DBF     | 1.21 (0.78)                                           | 1.35 (0.59) | 1.17 (0.68)                                           | 1.36 (0.62) | 0.68 (0.26)                                           | 0.76 (0.33) | 0.76 (0.33)                                           | 0.93 (0.44) | 1.28 (0.39)                              | 1.28 (0.39) |
| EBF     | 1.70 (0.55)                                           | 1.64 (0.85) | 1.65 (0.70)                                           | 1.46 (0.51) | 1.23 (0.69)                                           | 1.48 (0.85) | 1.88 (1.23)                                           | 1.71 (0.73) | 1.15 (0.48)                              | 1.15 (0.45) |
| MF      | 0.87 (0.17)                                           | 0.76 (0.45) | 0.89 (0.27)                                           | 0.97 (0.56) | 0.65 (0.18)                                           | 0.73 (0.42) | 0.79 (0.14)                                           | 0.79 (0.18) | 0.91 (0.47)                              | 0.81 (0.29) |
| SHR     | 0.73 (0.47)                                           | 0.78 (0.46) | 0.69 (0.44)                                           | 0.77 (0.37) | 0.50 (0.33)                                           | 0.70 (0.41) | 0.50 (0.34)                                           | 0.55 (0.36) | 0.57 (0.31)                              | 0.52 (0.15) |
| SAV     | 0.83 (0.44)                                           | 0.81 (0.18) | 0.87 (0.45)                                           | 0.84 (0.18) | 0.80 (0.53)                                           | 0.68 (0.41) | 0.86 (0.55)                                           | 0.77 (0.38) | 0.71 (0.36)                              | 0.69 (0.31) |
| GRA     | 1.22 (0.64)                                           | 1.22 (0.60) | 1.18 (0.68)                                           | 1.20 (0.62) | 1.00 (0.48)                                           | 1.01 (0.54) | 0.99 (0.58)                                           | 0.95 (0.52) | 0.76 (0.61)                              | 0.85 (0.49) |
| CRO     | 1.69 (1.38)                                           | 2.30 (1.02) | 1.57 (1.42)                                           | 2.24 (1.10) | 0.87 (0.46)                                           | 0.90 (0.57) | 0.80 (0.51)                                           | 0.98 (0.57) | 1.42 (0.90)                              | 1.44 (0.70) |
| WET     | 1.04 (0.95)                                           | 0.93 (0.77) | 1.03 (0.96)                                           | 0.78 (0.53) | 1.04 (0.87)                                           | 0.98 (0.82) | 1.07 (0.51)                                           | 1.02 (0.51) | 0.46 (0.19)                              | 0.64 (0.26) |
| Trop    | 1.93 (0.46)                                           | 1.74 (1.01) | 2.24 (0.62)                                           | 1.56 (0.78) | 2.07 (0.69)                                           | 1.55 (0.87) | 2.47 (0.74)                                           | 2.05 (0.43) | 1.28 (0.29)                              | 1.17 (0.46) |
| SubTrop | 1.37 (0.55)                                           | 1.40 (0.61) | 1.37 (0.56)                                           | 1.38 (0.57) | 1.03 (0.46)                                           | 1.00 (0.41) | 1.08 (0.36)                                           | 1.11 (0.40) | 1.13 (0.63)                              | 1.15 (0.62) |
| Dry     | 0.60 (0.24)                                           | 0.78 (0.36) | 0.63 (0.16)                                           | 0.74 (0.30) | 0.49 (0.10)                                           | 0.54 (0.20) | 0.58 (0.26)                                           | 0.67 (0.32) | 0.41 (0.13)                              | 0.46 (0.15) |
| Tmp     | 1.73 (1.02)                                           | 1.82 (0.99) | 1.73 (0.98)                                           | 1.71 (1.03) | 1.09 (0.54)                                           | 1.17 (0.67) | 1.24 (0.57)                                           | 1.31 (0.59) | 1.43 (0.59)                              | 1.40 (0.61) |
| TmpCont | 1.01 (0.42)                                           | 1.29 (0.59) | 1.00 (0.45)                                           | 1.26 (0.57) | 0.71 (0.30)                                           | 0.75 (0.38) | 0.74 (0.31)                                           | 0.79 (0.34) | 0.95 (0.39)                              | 1.02 (0.43) |
| Bor     | 0.66 (0.27)                                           | 0.70 (0.36) | 0.66 (0.27)                                           | 0.67 (0.33) | 0.48 (0.27)                                           | 0.47 (0.27) | 0.48 (0.16)                                           | 0.45 (0.21) | 0.50 (0.32)                              | 0.48 (0.22) |
| Cold    | 0.44 (0.04)                                           | 0.58 (0.42) | 0.51 (0.24)                                           | 0.46 (0.32) | 0.41 (0.06)                                           | 0.23 (0.06) | 0.57 (0.16)                                           | 0.29 (0.12) | 0.51 (0.21)                              | 0.54 (0.35) |

1049

1050 **Table C3.** Median site-by-site absolute bias of the carbon fluxes per PFT and climate zones. ENF is evergreen needle leaf forest, DBF deciduous broadleaf forest, EBF Evergreen  
1051 broadleaf forest, MF mixed forest, SHR shrubland, SAV Savannah, GRA Grassland, CRO cropland, WET Wetland, Trop Tropical, SubTrop Subtropical, Dry Dryland, Tmp Temperate,  
1052 TmpCont Temperate-continental, Bor Boreal, Cold cold environment or Iceland covered by ice.

| CAT     | GPP <sub>R</sub> (gCm <sup>-2</sup> d <sup>-1</sup> ) |             | GPP <sub>L</sub> (gCm <sup>-2</sup> d <sup>-1</sup> ) |             | TER <sub>R</sub> (gCm <sup>-2</sup> d <sup>-1</sup> ) |             | TER <sub>L</sub> (gCm <sup>-2</sup> d <sup>-1</sup> ) |             | NEE (gCm <sup>-2</sup> d <sup>-1</sup> ) |             |
|---------|-------------------------------------------------------|-------------|-------------------------------------------------------|-------------|-------------------------------------------------------|-------------|-------------------------------------------------------|-------------|------------------------------------------|-------------|
|         | RS                                                    | RS+METEO    | RS                                                    | RS+METEO    | RS                                                    | RS+METEO    | RS                                                    | RS+METEO    | RS                                       | RS+METEO    |
| ENF     | 0.53 (0.46)                                           | 0.54 (0.56) | 0.45 (0.42)                                           | 0.48 (0.50) | 0.47 (0.47)                                           | 0.50 (0.54) | 0.42 (0.40)                                           | 0.41 (0.43) | 0.39 (0.44)                              | 0.32 (0.36) |
| DBF     | 0.43 (0.38)                                           | 0.56 (0.59) | 0.42 (0.36)                                           | 0.50 (0.52) | 0.29 (0.32)                                           | 0.35 (0.35) | 0.39 (0.33)                                           | 0.42 (0.34) | 0.60 (0.28)                              | 0.55 (0.30) |
| EBF     | 0.82 (0.91)                                           | 0.77 (0.50) | 0.75 (0.81)                                           | 0.76 (0.48) | 0.88 (0.98)                                           | 0.84 (0.72) | 0.76 (0.81)                                           | 0.93 (0.65) | 0.36 (0.45)                              | 0.46 (0.44) |
| MF      | 0.47 (0.20)                                           | 0.34 (0.38) | 0.38 (0.29)                                           | 0.57 (0.29) | 0.39 (0.28)                                           | 0.41 (0.13) | 0.37 (0.15)                                           | 0.30 (0.35) | 0.34 (0.49)                              | 0.32 (0.36) |
| SHR     | 0.38 (0.37)                                           | 0.54 (0.49) | 0.38 (0.44)                                           | 0.39 (0.47) | 0.36 (0.38)                                           | 0.50 (0.43) | 0.31 (0.40)                                           | 0.32 (0.23) | 0.27 (0.27)                              | 0.28 (0.24) |
| SAV     | 0.42 (0.40)                                           | 0.36 (0.21) | 0.35 (0.40)                                           | 0.23 (0.15) | 0.43 (0.41)                                           | 0.35 (0.23) | 0.42 (0.37)                                           | 0.31 (0.10) | 0.23 (0.21)                              | 0.19 (0.10) |
| GRA     | 0.60 (0.59)                                           | 0.48 (0.49) | 0.60 (0.56)                                           | 0.52 (0.55) | 0.38 (0.29)                                           | 0.36 (0.37) | 0.44 (0.39)                                           | 0.38 (0.38) | 0.17 (0.20)                              | 0.31 (0.31) |
| CRO     | 0.47 (0.37)                                           | 0.66 (0.44) | 0.36 (0.33)                                           | 0.56 (0.47) | 0.29 (0.32)                                           | 0.25 (0.22) | 0.29 (0.32)                                           | 0.30 (0.29) | 0.41 (0.31)                              | 0.56 (0.55) |
| WET     | 0.54 (0.64)                                           | 0.28 (0.41) | 0.55 (0.62)                                           | 0.29 (0.25) | 0.72 (0.35)                                           | 0.48 (0.52) | 0.69 (0.29)                                           | 0.50 (0.51) | 0.24 (0.19)                              | 0.30 (0.25) |
| Trop    | 1.66 (1.31)                                           | 0.67 (0.79) | 1.71 (1.23)                                           | 0.77 (0.86) | 1.73 (0.88)                                           | 1.16 (1.19) | 1.94 (0.81)                                           | 1.21 (0.67) | 0.52 (0.57)                              | 0.38 (0.55) |
| SubTrop | 0.54 (0.45)                                           | 0.55 (0.43) | 0.50 (0.38)                                           | 0.52 (0.55) | 0.46 (0.44)                                           | 0.53 (0.47) | 0.47 (0.35)                                           | 0.42 (0.37) | 0.34 (0.44)                              | 0.37 (0.34) |
| Dry     | 0.31 (0.20)                                           | 0.33 (0.26) | 0.33 (0.38)                                           | 0.36 (0.29) | 0.24 (0.21)                                           | 0.32 (0.35) | 0.34 (0.21)                                           | 0.43 (0.26) | 0.14 (0.08)                              | 0.22 (0.14) |
| Tmp     | 0.72 (0.55)                                           | 0.77 (0.71) | 0.66 (0.59)                                           | 0.63 (0.56) | 0.50 (0.46)                                           | 0.47 (0.50) | 0.51 (0.55)                                           | 0.41 (0.45) | 0.46 (0.43)                              | 0.51 (0.41) |
| TmpCont | 0.45 (0.35)                                           | 0.60 (0.52) | 0.39 (0.35)                                           | 0.57 (0.47) | 0.37 (0.28)                                           | 0.29 (0.25) | 0.37 (0.33)                                           | 0.38 (0.37) | 0.35 (0.40)                              | 0.55 (0.55) |
| Bor     | 0.36 (0.30)                                           | 0.32 (0.34) | 0.32 (0.24)                                           | 0.27 (0.31) | 0.32 (0.40)                                           | 0.32 (0.33) | 0.31 (0.35)                                           | 0.26 (0.32) | 0.27 (0.26)                              | 0.23 (0.26) |
| Cold    | 0.07 (0.00)                                           | 0.08 (0.09) | 0.08 (0.12)                                           | 0.15 (0.06) | 0.34 (0.04)                                           | 0.12 (0.06) | 0.34 (0.06)                                           | 0.15 (0.01) | 0.37 (0.15)                              | 0.27 (0.27) |

1053



1054 **Table C4.** Median site-by-site  $R^2$  of the energy fluxes per PFT and climate zones. ENF is evergreen needle  
 1055 leaf forest, DBF deciduous broadleaf forest, EBF Evergreen broadleaf forest, MF mixed forest, SHR  
 1056 shrubland, SAV Savannah, GRA Grassland, CRO cropland, WET Wetland, Trop Tropical, SubTrop Subtropical,  
 1057 Dry Dryland, Tmp Temperate, TmpCont Temperate-continental, Bor Boreal, Cold cold environment or  
 1058 Iceland covered by ice.

| CAT     | H           |             | LE          |             | Rn          |             |
|---------|-------------|-------------|-------------|-------------|-------------|-------------|
|         | RS          | RS+METEO    | RS          | RS+METEO    | RS          | RS+METEO    |
| ENF     | 0.87 (0.10) | 0.86 (0.10) | 0.83 (0.10) | 0.84 (0.11) | 0.97 (0.02) | 0.97 (0.02) |
| DBF     | 0.76 (0.18) | 0.74 (0.12) | 0.87 (0.05) | 0.87 (0.07) | 0.97 (0.01) | 0.97 (0.02) |
| EBF     | 0.85 (0.13) | 0.82 (0.17) | 0.56 (0.30) | 0.52 (0.42) | 0.95 (0.05) | 0.96 (0.03) |
| MF      | 0.85 (0.06) | 0.82 (0.10) | 0.91 (0.07) | 0.89 (0.06) | 0.97 (0.02) | 0.96 (0.02) |
| SHR     | 0.83 (0.15) | 0.83 (0.17) | 0.73 (0.29) | 0.77 (0.23) | 0.98 (0.01) | 0.97 (0.01) |
| SAV     | 0.74 (0.25) | 0.77 (0.26) | 0.85 (0.06) | 0.78 (0.11) | 0.86 (0.05) | 0.88 (0.10) |
| GRA     | 0.72 (0.22) | 0.71 (0.22) | 0.85 (0.11) | 0.83 (0.16) | 0.96 (0.02) | 0.96 (0.02) |
| CRO     | 0.70 (0.16) | 0.66 (0.18) | 0.79 (0.14) | 0.80 (0.14) | 0.97 (0.02) | 0.96 (0.02) |
| WET     | 0.81 (0.06) | 0.78 (0.14) | 0.86 (0.10) | 0.84 (0.06) | 0.94 (0.02) | 0.92 (0.06) |
| Trop    | 0.52 (0.18) | 0.60 (0.32) | 0.56 (0.38) | 0.50 (0.44) | 0.86 (0.14) | 0.89 (0.13) |
| SubTrop | 0.81 (0.18) | 0.82 (0.18) | 0.78 (0.13) | 0.80 (0.13) | 0.96 (0.03) | 0.96 (0.02) |
| Dry     | 0.87 (0.07) | 0.86 (0.13) | 0.80 (0.07) | 0.79 (0.14) | 0.90 (0.06) | 0.93 (0.05) |
| Tmp     | 0.78 (0.14) | 0.78 (0.13) | 0.86 (0.11) | 0.83 (0.13) | 0.97 (0.02) | 0.96 (0.02) |
| TmpCont | 0.72 (0.18) | 0.69 (0.18) | 0.83 (0.08) | 0.84 (0.09) | 0.97 (0.02) | 0.96 (0.02) |
| Bor     | 0.90 (0.07) | 0.89 (0.08) | 0.92 (0.05) | 0.92 (0.03) | 0.98 (0.01) | 0.97 (0.02) |
| Cold    | 0.83 (0.12) | 0.57 (0.19) | 0.83 (0.08) | 0.82 (0.07) | 0.94 (0.03) | 0.85 (0.13) |

1059



1060 **Table C5.** Median site-by-site RMSE of the energy fluxes per PFT and climate zones. ENF is evergreen needle  
 1061 leaf forest, DBF deciduous broadleaf forest, EBF Evergreen broadleaf forest, MF mixed forest, SHR  
 1062 shrubland, SAV Savannah, GRA Grassland, CRO cropland, WET Wetland, Trop Tropical, SubTrop Subtropical,  
 1063 Dry Dryland, Tmp Temperate, TmpCont Temperate-continental, Bor Boreal, Cold cold environment or  
 1064 Iceland covered by ice.

| CAT     | H (MJm <sup>-2</sup> d <sup>-1</sup> ) |             | LE (MJm <sup>-2</sup> d <sup>-1</sup> ) |             | Rn (MJm <sup>-2</sup> d <sup>-1</sup> ) |             |
|---------|----------------------------------------|-------------|-----------------------------------------|-------------|-----------------------------------------|-------------|
|         | RS                                     | RS+METEO    | RS                                      | RS+METEO    | RS                                      | RS+METEO    |
| ENF     | 1.09 (0.25)                            | 1.16 (0.25) | 1.00 (0.56)                             | 1.02 (0.55) | 1.27 (0.68)                             | 1.26 (0.57) |
| DBF     | 1.30 (0.43)                            | 1.31 (0.38) | 1.22 (0.26)                             | 1.14 (0.46) | 1.11 (0.42)                             | 1.24 (0.41) |
| EBF     | 1.14 (0.60)                            | 1.29 (0.76) | 1.55 (0.39)                             | 1.60 (0.46) | 1.33 (0.43)                             | 1.14 (0.56) |
| MF      | 1.18 (0.44)                            | 1.12 (0.42) | 0.82 (0.37)                             | 1.15 (0.54) | 1.14 (0.45)                             | 1.09 (0.43) |
| SHR     | 1.21 (0.46)                            | 1.14 (0.28) | 1.12 (0.41)                             | 1.11 (0.56) | 1.37 (0.80)                             | 1.01 (0.43) |
| SAV     | 1.23 (0.25)                            | 1.20 (0.22) | 1.32 (0.56)                             | 1.35 (0.30) | 1.10 (0.33)                             | 1.19 (0.60) |
| GRA     | 1.14 (0.35)                            | 1.08 (0.47) | 1.09 (0.34)                             | 1.32 (0.54) | 1.48 (0.83)                             | 1.48 (0.90) |
| CRO     | 1.24 (0.45)                            | 1.36 (0.33) | 1.51 (0.61)                             | 1.54 (0.35) | 1.24 (0.52)                             | 1.23 (0.26) |
| WET     | 0.97 (0.36)                            | 1.22 (0.60) | 0.88 (0.13)                             | 0.90 (0.18) | 1.42 (0.51)                             | 1.65 (0.71) |
| Trop    | 0.98 (0.51)                            | 1.19 (0.63) | 1.60 (0.52)                             | 1.62 (0.41) | 1.33 (0.73)                             | 1.03 (0.48) |
| SubTrop | 1.28 (0.38)                            | 1.32 (0.46) | 1.36 (0.62)                             | 1.36 (0.53) | 1.40 (0.40)                             | 1.33 (0.49) |
| Dry     | 1.07 (0.24)                            | 1.05 (0.50) | 1.21 (0.33)                             | 1.27 (0.52) | 1.61 (0.75)                             | 2.02 (0.93) |
| Tmp     | 1.18 (0.23)                            | 1.15 (0.33) | 1.18 (0.43)                             | 1.17 (0.49) | 1.10 (0.36)                             | 1.14 (0.47) |
| TmpCont | 1.30 (0.42)                            | 1.35 (0.37) | 1.25 (0.41)                             | 1.47 (0.37) | 1.17 (0.65)                             | 1.16 (0.54) |
| Bor     | 0.98 (0.23)                            | 1.05 (0.26) | 0.70 (0.26)                             | 0.61 (0.20) | 0.88 (0.31)                             | 1.08 (0.50) |
| Cold    | 1.03 (0.36)                            | 1.50 (0.55) | 1.00 (0.23)                             | 1.03 (0.45) | 1.47 (0.18)                             | 2.04 (0.19) |

1065

1066 **Table C6.** Median site-by-site absolute bias for energy fluxes. . ENF is evergreen needle leaf forest, DBF  
 1067 deciduous broadleaf forest, EBF Evergreen broadleaf forest, MF mixed forest, SHR shrubland, SAV  
 1068 Savannah, GRA Grassland, CRO cropland, WET Wetland, Trop Tropical, SubTrop Subtropical, Dry Dryland,  
 1069 Tmp Temperate, TmpCont Temperate-continental, Bor Boreal, Cold cold environment or Iceland covered by  
 1070 ice.

| CAT     | H (MJm <sup>-2</sup> d <sup>-1</sup> ) |             | LE (MJm <sup>-2</sup> d <sup>-1</sup> ) |             | Rn (MJm <sup>-2</sup> d <sup>-1</sup> ) |             |
|---------|----------------------------------------|-------------|-----------------------------------------|-------------|-----------------------------------------|-------------|
|         | RS                                     | RS+METEO    | RS                                      | RS+METEO    | RS                                      | RS+METEO    |
| ENF     | 0.44 (0.40)                            | 0.40 (0.33) | 0.42 (0.41)                             | 0.44 (0.49) | 0.78 (0.63)                             | 0.64 (0.61) |
| DBF     | 0.60 (0.35)                            | 0.66 (0.35) | 0.57 (0.56)                             | 0.49 (0.50) | 0.38 (0.28)                             | 0.61 (0.49) |
| EBF     | 0.38 (0.48)                            | 0.55 (0.46) | 0.97 (0.79)                             | 0.88 (0.70) | 0.88 (0.51)                             | 0.62 (0.43) |
| MF      | 0.48 (0.40)                            | 0.26 (0.31) | 0.34 (0.40)                             | 0.64 (0.52) | 0.56 (0.45)                             | 0.56 (0.57) |
| SHR     | 0.34 (0.43)                            | 0.47 (0.52) | 0.41 (0.41)                             | 0.50 (0.43) | 0.62 (0.76)                             | 0.44 (0.52) |
| SAV     | 0.68 (0.35)                            | 0.56 (0.15) | 0.63 (0.80)                             | 0.40 (0.15) | 0.27 (0.22)                             | 0.63 (0.55) |
| GRA     | 0.51 (0.39)                            | 0.40 (0.24) | 0.38 (0.38)                             | 0.57 (0.50) | 0.97 (0.81)                             | 0.81 (1.03) |
| CRO     | 0.23 (0.21)                            | 0.24 (0.24) | 0.36 (0.38)                             | 0.41 (0.50) | 0.66 (0.58)                             | 0.68 (0.39) |
| WET     | 0.47 (0.51)                            | 0.67 (0.37) | 0.54 (0.41)                             | 0.38 (0.21) | 0.34 (0.34)                             | 0.83 (0.78) |
| Trop    | 0.37 (0.51)                            | 0.67 (0.47) | 0.97 (0.79)                             | 1.24 (0.82) | 0.94 (1.10)                             | 0.63 (0.60) |
| SubTrop | 0.58 (0.59)                            | 0.50 (0.39) | 0.62 (0.58)                             | 0.58 (0.56) | 0.83 (0.71)                             | 0.70 (0.55) |
| Dry     | 0.68 (0.62)                            | 0.55 (0.56) | 0.21 (0.14)                             | 0.30 (0.26) | 1.06 (0.55)                             | 1.61 (0.91) |
| Tmp     | 0.38 (0.23)                            | 0.34 (0.31) | 0.49 (0.46)                             | 0.56 (0.54) | 0.65 (0.49)                             | 0.68 (0.58) |
| TmpCont | 0.49 (0.41)                            | 0.40 (0.46) | 0.44 (0.51)                             | 0.53 (0.50) | 0.69 (0.72)                             | 0.61 (0.58) |
| Bor     | 0.33 (0.32)                            | 0.38 (0.24) | 0.22 (0.16)                             | 0.23 (0.24) | 0.38 (0.27)                             | 0.50 (0.47) |
| Cold    | 0.43 (0.46)                            | 0.71 (0.11) | 0.56 (0.31)                             | 0.39 (0.18) | 0.30 (0.29)                             | 0.86 (0.58) |

1071

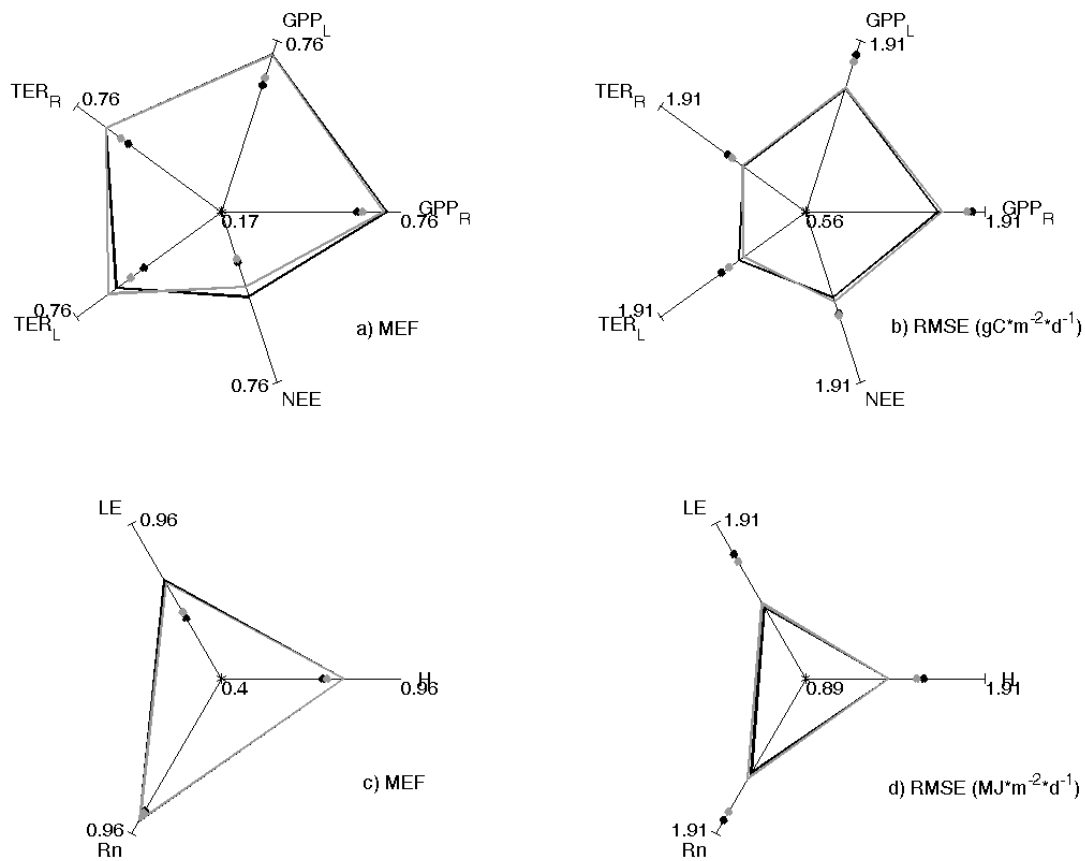

**Fig. 1:** Spider plot of MEF (first column) and RMSE (second column) for carbon (first row) and energy fluxes (second row) showing the consistency of prediction made RS (Black line) and RS+METEO (grey lines) setups. The lines are the ensemble median estimate; we also show the performance of multiple regressions trained with RS (black point) and RS+METEO (gray points). GPP<sub>R</sub> and GPP<sub>L</sub> are respectively gross primary production estimated following Reichstein et al. (2005) and Lasslop et al. (2010), TER<sub>R</sub> and TER<sub>L</sub> the total ecosystem respiration estimated following Reichstein et al. (2005) and Lasslop et al. (2010), NEE net ecosystem exchange, H the sensible heat, LE the latent heat and Rn the net radiation.

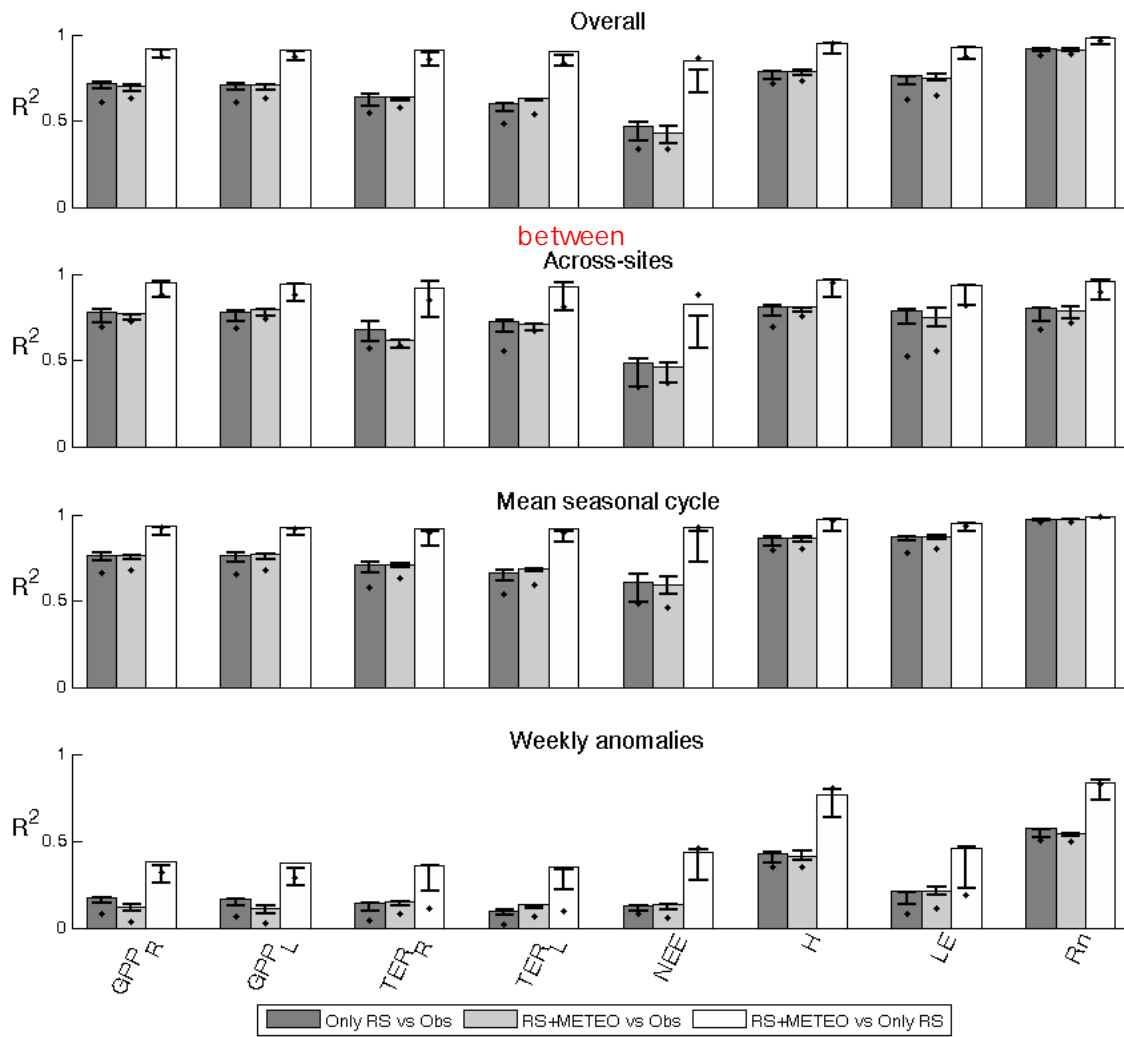

**Fig. 2:** Coefficients of determination ( $R^2$ ) from the comparison of overall time series, across-sites, mean seasonal cycle, and the anomalies, in particular: the determination coefficients between predictions by the ensemble median estimate of RS setup and observation (dark grey bars), between predictions by the ensemble median estimate of RS+METEO setup and observation (light grey bars), and between the two ensembles median estimate (white bars). Whiskers are the higher and lower  $R^2$  when the comparisons are made among the singular ML. The comparison of output by the multiple regressions is also shown (black points).

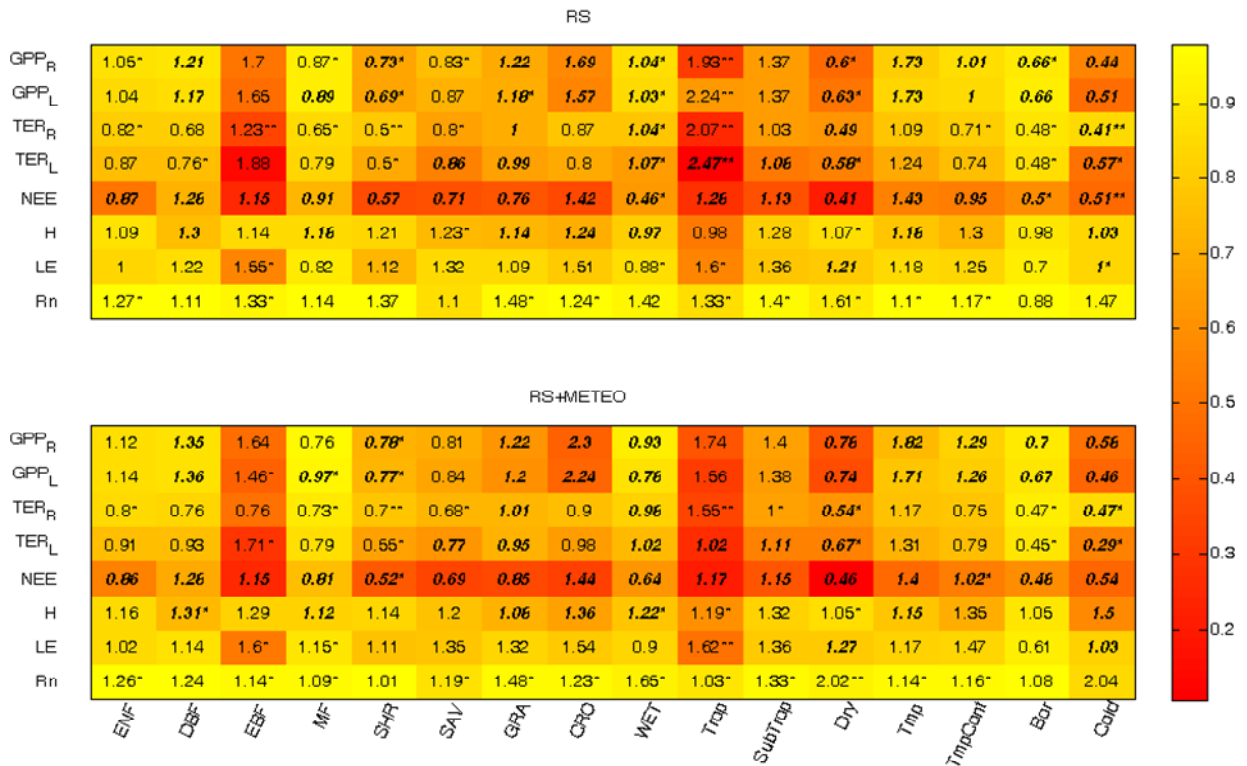

**Fig. 3:** Performance of FLUXCOM median estimates per climate zone and plant functional type (PFT). The colored matrices show the median values of  $R^2$  (red pixels for low  $R^2$ , yellow pixels for high  $R^2$ ). Number indicate the RMSE (units of carbon fluxes are  $\text{gCm}^{-2}\text{d}^{-1}$  and  $\text{MJm}^{-2}\text{d}^{-1}$  in the case of energy fluxes). Oblique and bold font are used when the relative RMSE (normalized for the mean observed fluxes per PFT and climate zone) is greater than 0.5. The symbols “\*\*” after RMSE are used when the weight of bias (estimated as the ratio between the square of median absolute bias and the MSE) is greater than 0.5, instead “\*” are used if the weight of bias is between 0.25 and 0.5. No symbols are used if the weight of bias is lesser than 0.25.

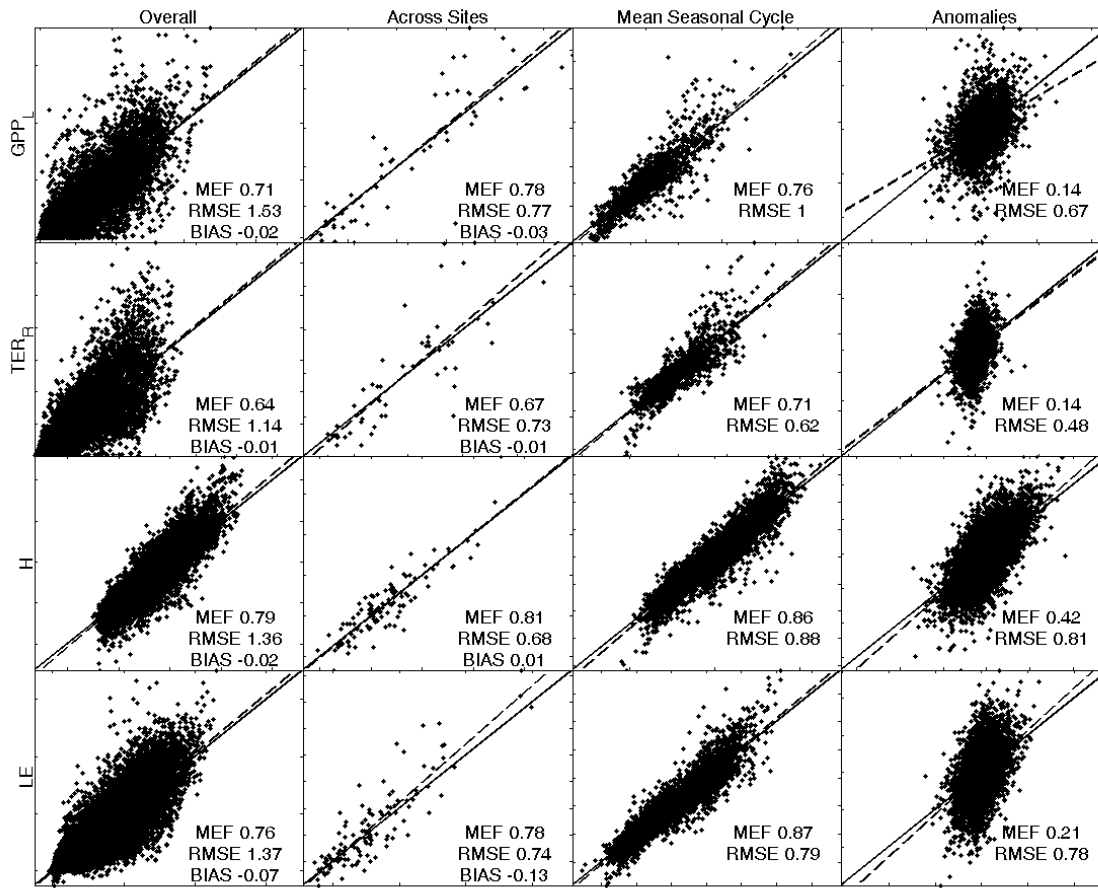

**Fig. B1.** Scatterplots of observed data by eddy covariance (y-axis) and the median ensemble of modeled fluxes by RS setup (x-axis). The panels from left to right are the eight days predictions, across sites variability, mean seasonal cycle and weekly anomalies. The fluxes considered here are GPP<sub>L</sub> (first row), TER<sub>R</sub> (second row), H (third row) and LE (fourth row).

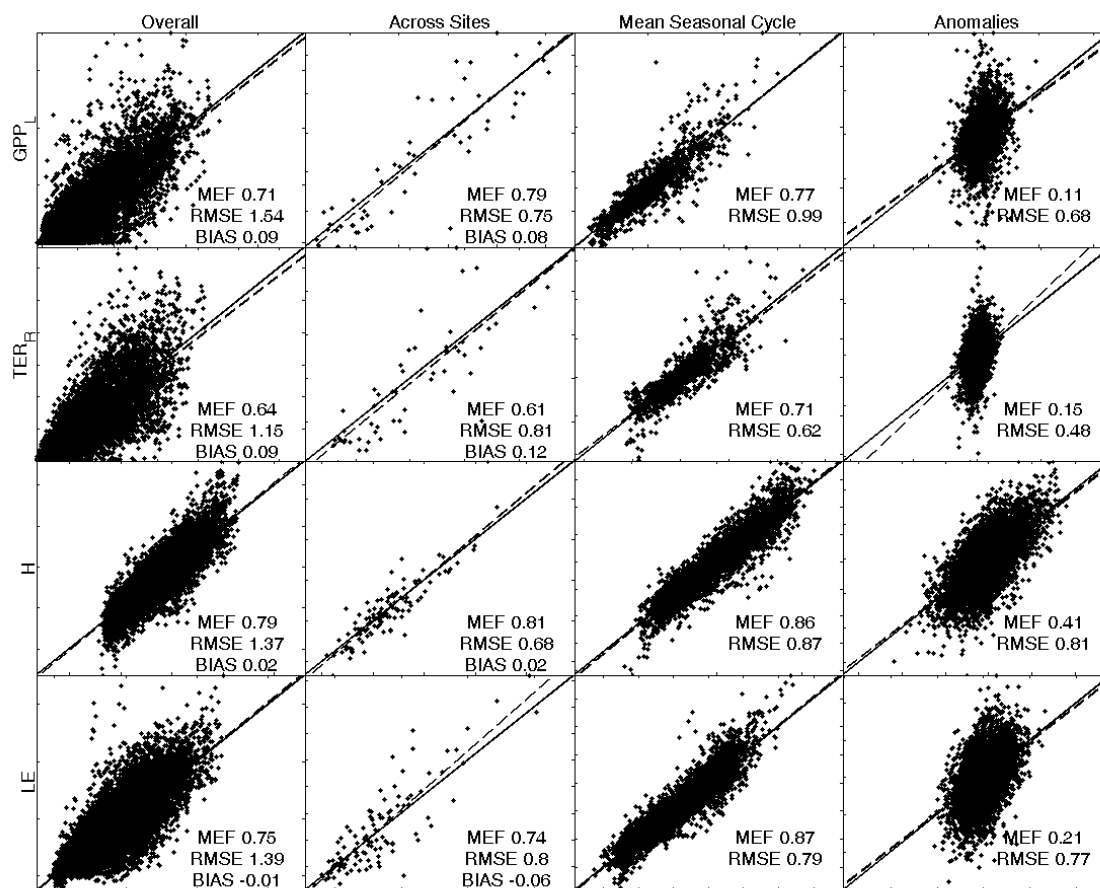

1112

1113 **Fig. B2.** As Fig. B1 but the predictions (x-axis) were obtained by the RS+METEO setup.
